# Supplementary material for: NHC-catalyzed [4 + 2] annulations of allenoates and 2,3-dioxopyrrolidine derivatives
Source: Royal Society of Chemistry journal article supplement (doi:10.1039/d1ob02180j), 2022-01-01
Supplement: d1ob02180j1.pdf [file d1ob02180j1.pdf]

## Supporting Information

### **NHC-Catalyzed [4+2] Annulations of Allenates and 2,3-Dioxopyrrolidine Derivatives**

Xue Song, Yangxu Chen, Fangfang Lu, Kai Zhang,\* Chenxia Yu, Tuanjie Li<sup>†</sup> and Changsheng Yao\*

<sup>†</sup>Jiangsu Key Laboratory of Green Synthetic Chemistry for Functional Materials, School of Chemistry and Material Science,

Jiangsu Normal University, Xuzhou Jiangsu 221116, P. R. China  
cxyao@jsnu.edu.cn

|                                                                  |    |
|------------------------------------------------------------------|----|
| <b>1. General methods</b> .....                                  | 2  |
| <b>1.1 Syntheses of NHC precursors</b> .....                     | 2  |
| <b>1.2 Syntheses of allenates</b> .....                          | 2  |
| <b>1.3 Syntheses of 2,3-dioxopyrrolidine derivatives</b> .....   | 2  |
| <b>2. <sup>1</sup>H NMR and <sup>13</sup>C NMR Spectra</b> ..... | 3  |
| <b>3. HPLC data of 3a</b> .....                                  | 25 |
| <b>4. References</b> .....                                       | 27 |

## 1 General methods

Common reagents and materials were purchased from commercial sources and purified by recrystallization or distillation.  $^1\text{H}$  NMR spectra were measured on a Bruker DPX 400 MHz spectrometer in  $\text{CDCl}_3$  (100 MHz,  $^{13}\text{C}$  NMR) with chemical shift ( $\delta$ ) given in ppm relative to TMS as internal standard. Multiplicity was indicated as follows: s (singlet), d (doublet), t (triplet), q (quartet), m (multiplet). Coupling constants were reported in Hertz (Hz). IR spectra were taken on a FT-IR-Tensor 27 spectrometer in KBr pellets and reported in  $\text{cm}^{-1}$ . High-resolution mass spectra (HRMS) were obtained on a micrOTOF-Q II HRMS/MS instrument (Bruker). HPLC analysis was performed on high performance liquid chromatography, UV detection monitored at 254 nm, using an IC column with hexane and  $^i\text{PrOH}$  as the eluent.

### 1.1 Syntheses of NHC precursors

These precatalysts were prepared according to the known reports<sup>1</sup>.

### 1.2 Syntheses of allenates

These allenates were prepared according to the known reports<sup>2</sup>.

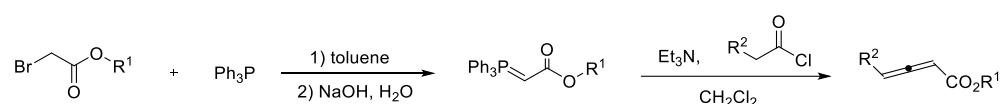

A 250 mL flask was charged with  $\text{PPh}_3$  (13.104 g, 50 mmol) and 100 mL of toluene. To this solution was added bromoacetate esters (50 mmol) over 15 minutes. The solution was stirred for 12 hours and the precipitate was filtered, washed with cold toluene ( $3 \times 5$  mL) and dried. The collected phosphonium salt was dissolved in  $\text{H}_2\text{O}$  (150 mL). The mixture was cooled in an ice bath and saturated aqueous  $\text{NaOH}$  was added dropwise. The solid was filtered and washed with cold  $\text{H}_2\text{O}$ , collected and dried in vacuo to afford stabilized ylides.

A flask was charged with stabilized ylide,  $\text{CH}_2\text{Cl}_2$  and  $\text{Et}_3\text{N}$ . After 10 minutes the appropriate acid chloride was added as a solution (5 mL) in  $\text{CH}_2\text{Cl}_2$  slowly such that the temperature of the reaction remained constant. After 30 minutes, the color of the reaction mixture changes to clear yellow. After the completion of the reaction (TLC), the solution was concentrated to afford a gummy residue. This was treated with hexane (25 mL), stirred well, and allowed to sit undisturbed for 2 hours. The mixture was filtered and the filtrate evaporated and passed through a short pad of silica gel (petroleum ether/ $\text{EtOAc} = 20/1$ ) to afford the pure allenic esters in 80–90% yield.

### 1.3 Syntheses of 2,3-dioxopyrrolidine derivatives

These 2,3-dioxopyrrolidines were prepared according to the known reports<sup>3</sup>.

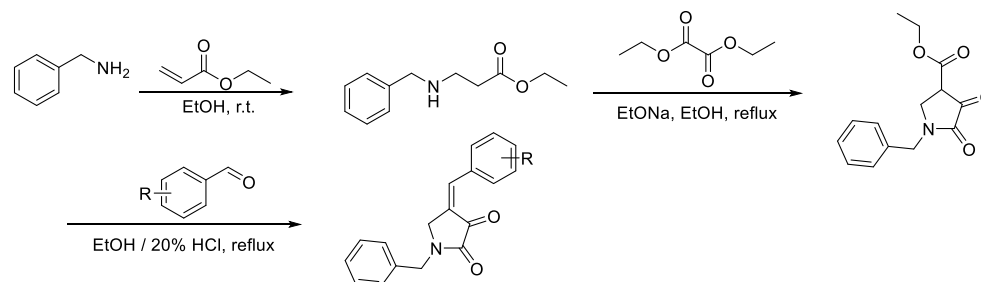

A solution of benzylamine (66.0 mmol), ethyl acrylate (66.0 mmol) in  $\text{EtOH}$  (20 mL) was allowed to stand at room temperature for 16 h. Diethyl oxalate (66.0 mmol) and freshly-made sodium ethoxide solution in  $\text{EtOH}$  (generated from 2.0 g of sodium metal, 80.0 mmol, in 30

mL EtOH) was added, and the mixture was heated at reflux for 1 h. The solvent was removed in vacuo. The crude product was diluted with H<sub>2</sub>O (80 mL) and following acidification of the mixture and several hours standing to complete the precipitation. The resultant ethyl 1-benzyl-4,5-dioxopyrrolidine-3-carboxylate was collected by filtration and washed with diethyl ether as a white solid.

A single necked 250 mL round-bottom flask equipped with a magnetic stirring bar was charged with ethyl 1-benzyl-4,5-dioxopyrrolidine-3-carboxylate (10 mmol) and aldehyde (11 mmol) in 20 mL EtOH and 20% HCl 50 mL. The mixture was heated at reflux for 5 h and evaporate in vacuo to remove EtOH. The residue was extracted with CH<sub>2</sub>Cl<sub>2</sub> (3 × 50 mL). The combined organic layers were washed with brine solution, dried over Na<sub>2</sub>SO<sub>4</sub>, filtered and concentrated in vacuo. The product was purified by column chromatography (PE/EA/CH<sub>2</sub>Cl<sub>2</sub> = 10/1/1 to 2/1/1).

## 2 <sup>1</sup>H NMR and <sup>13</sup>C NMR Spectra

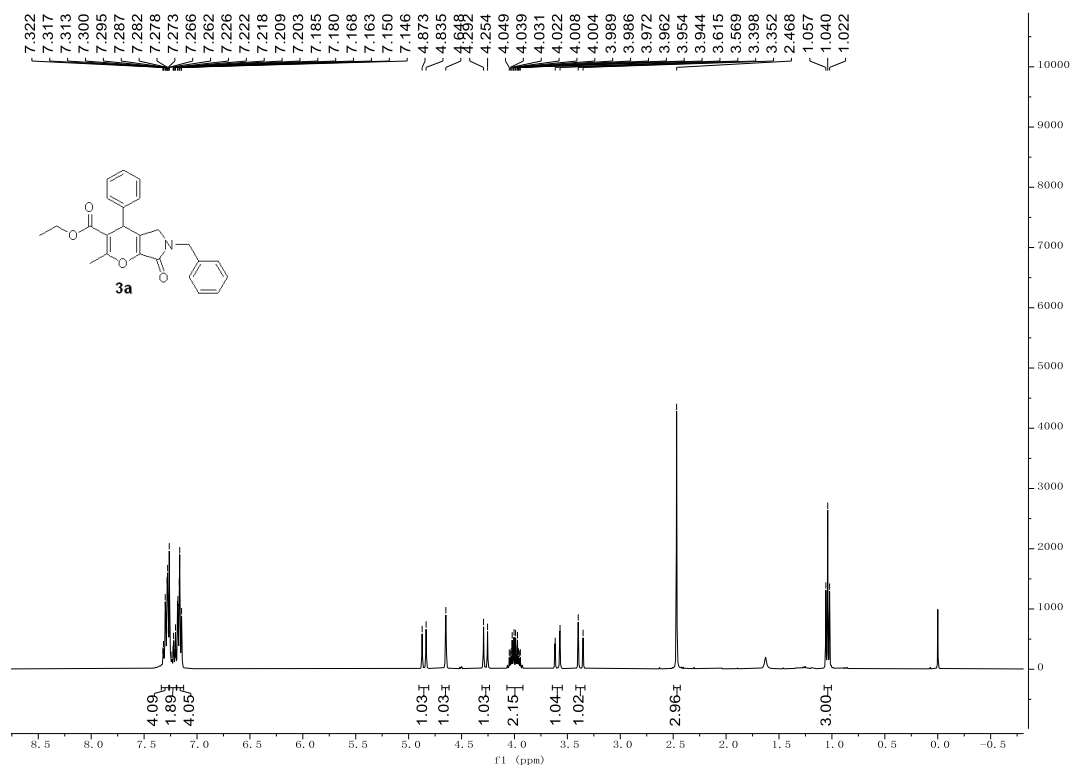

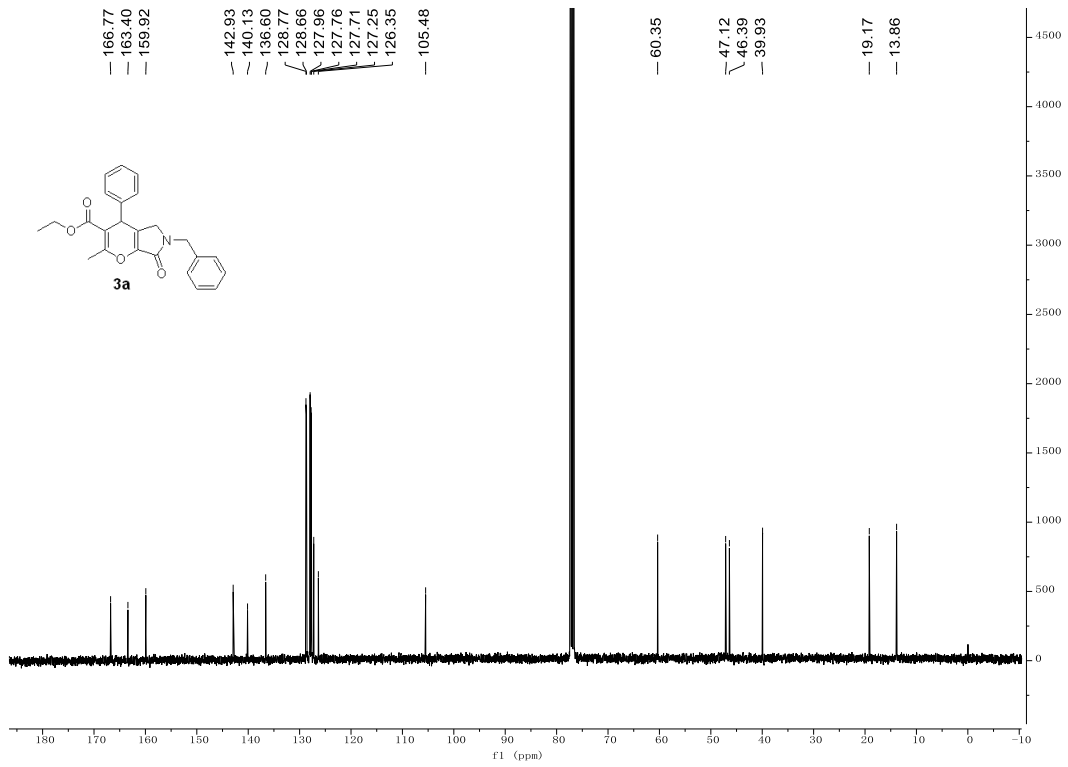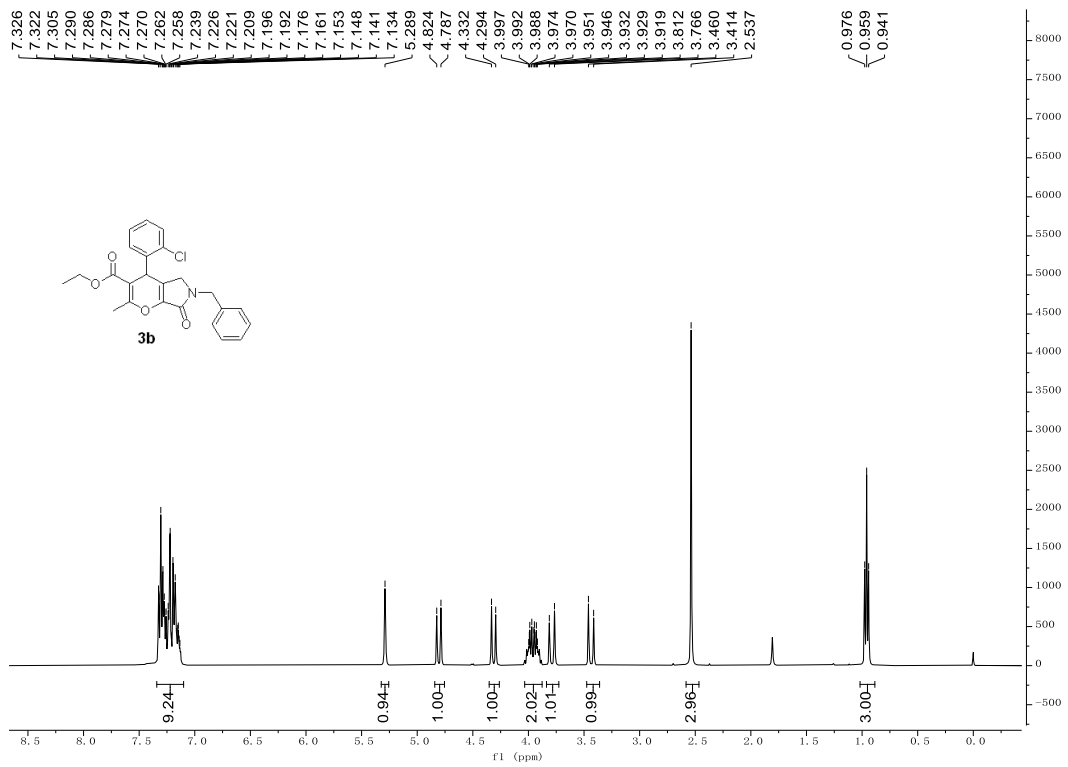

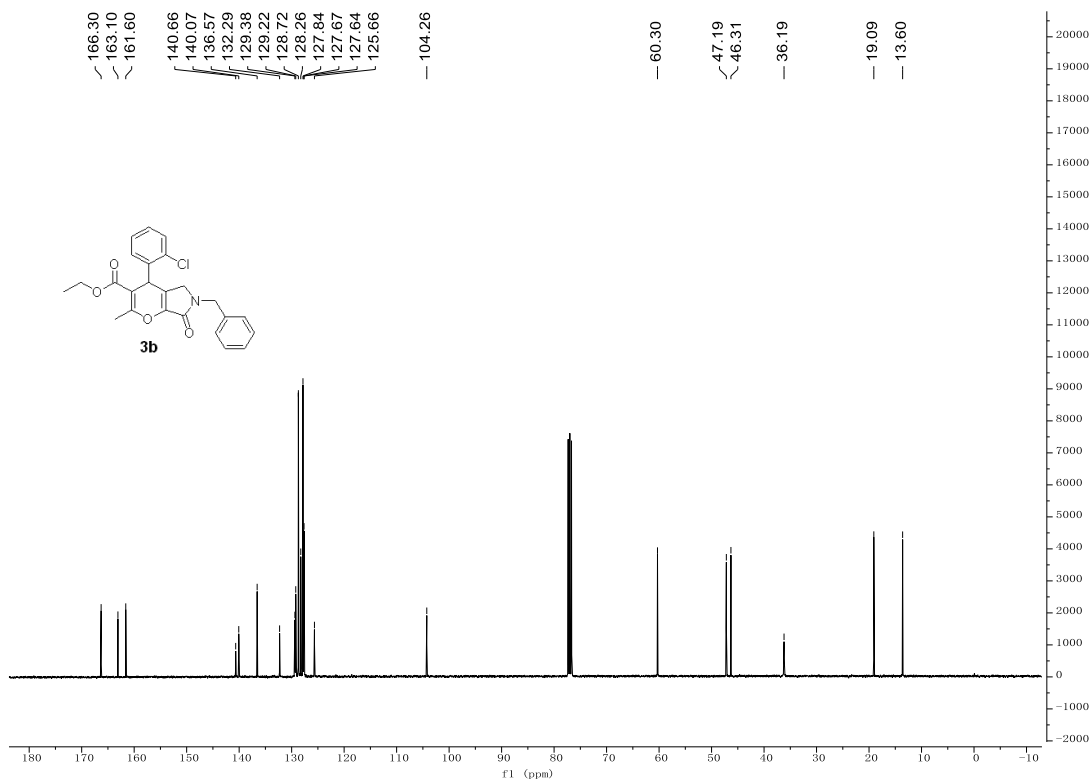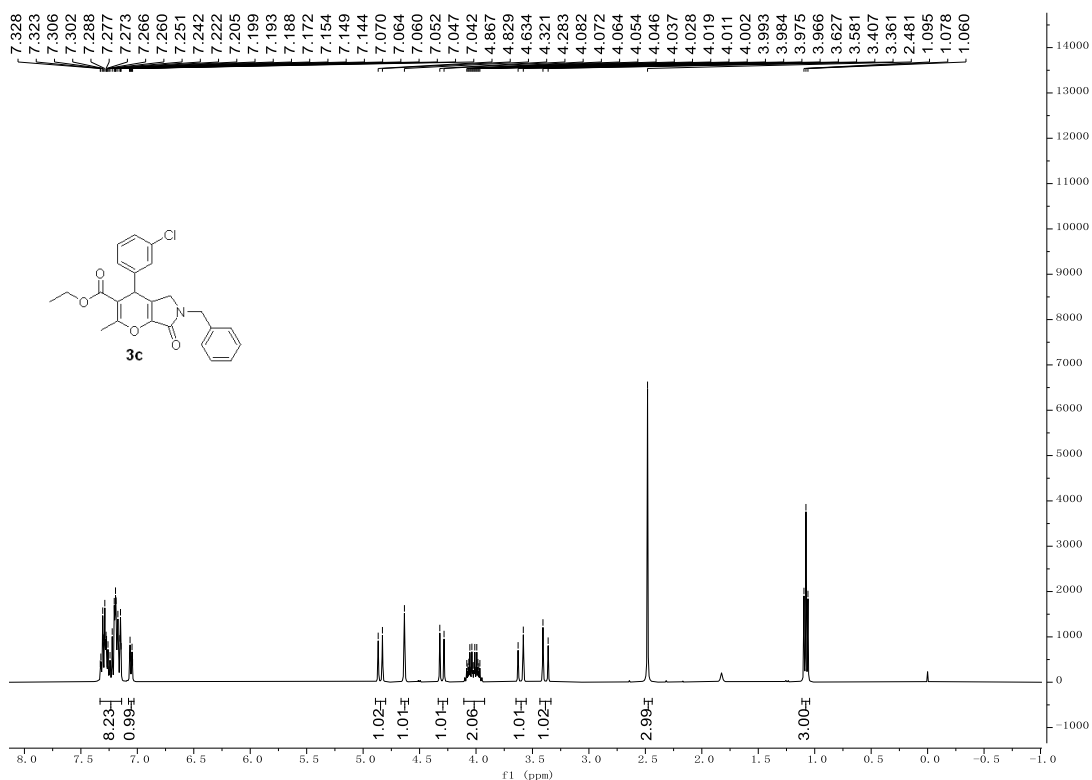

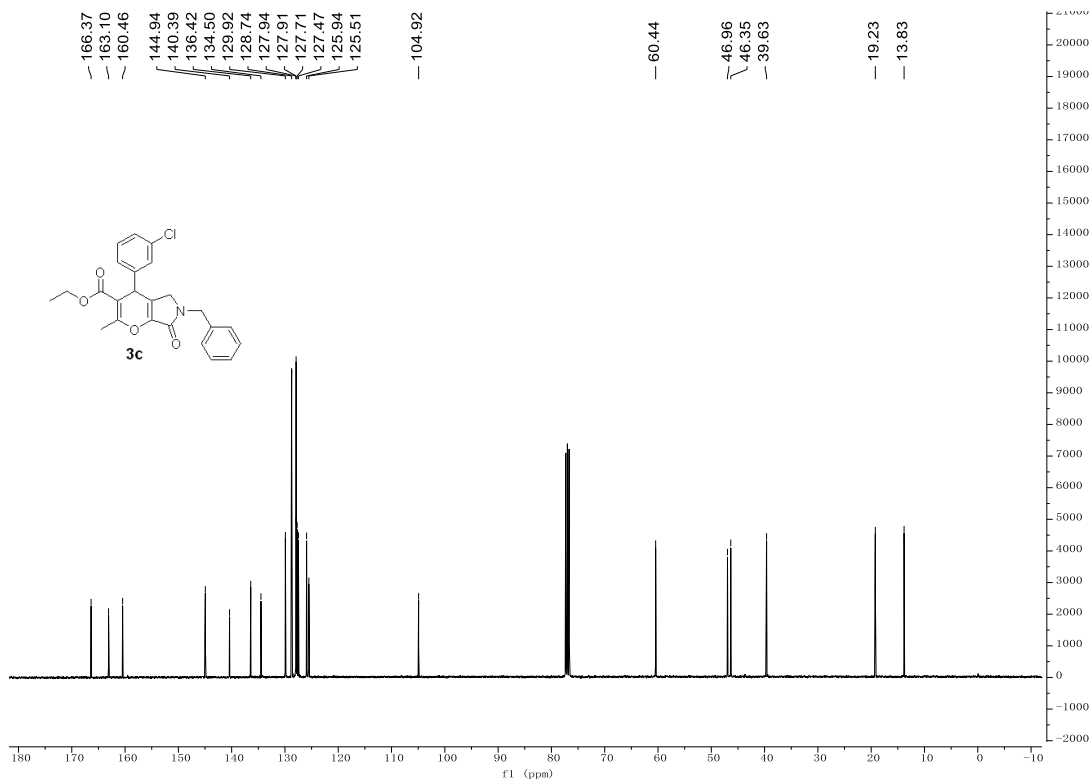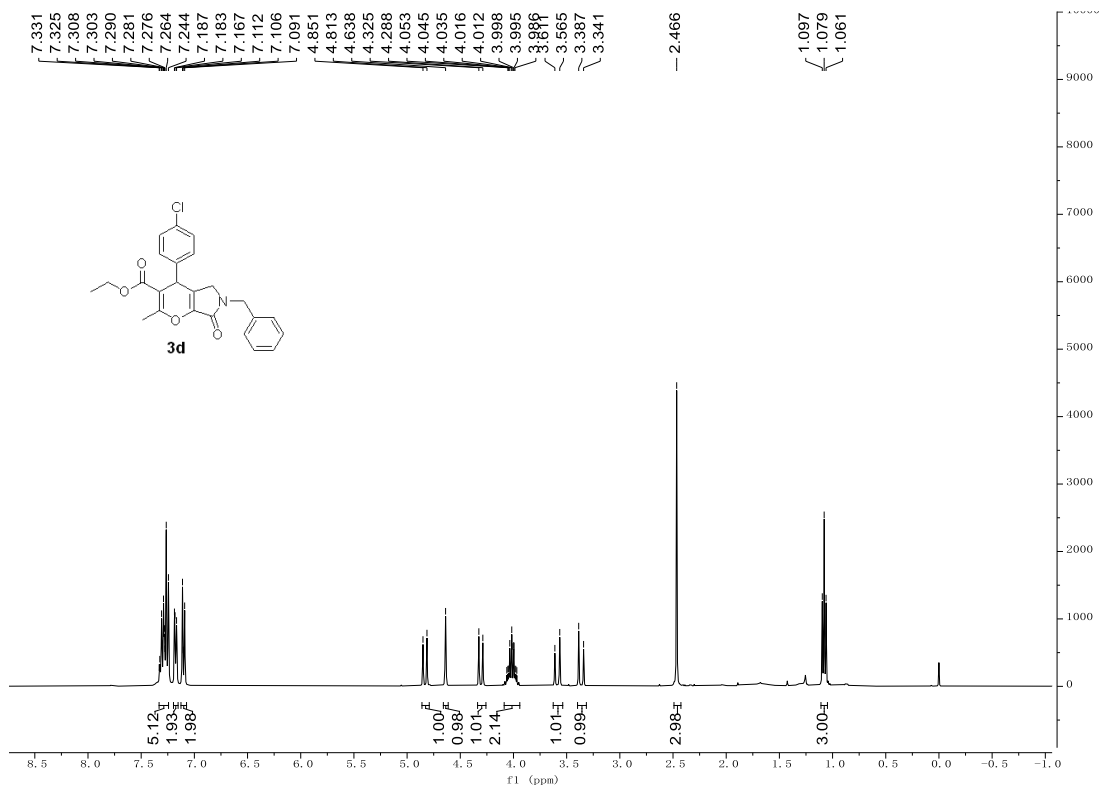

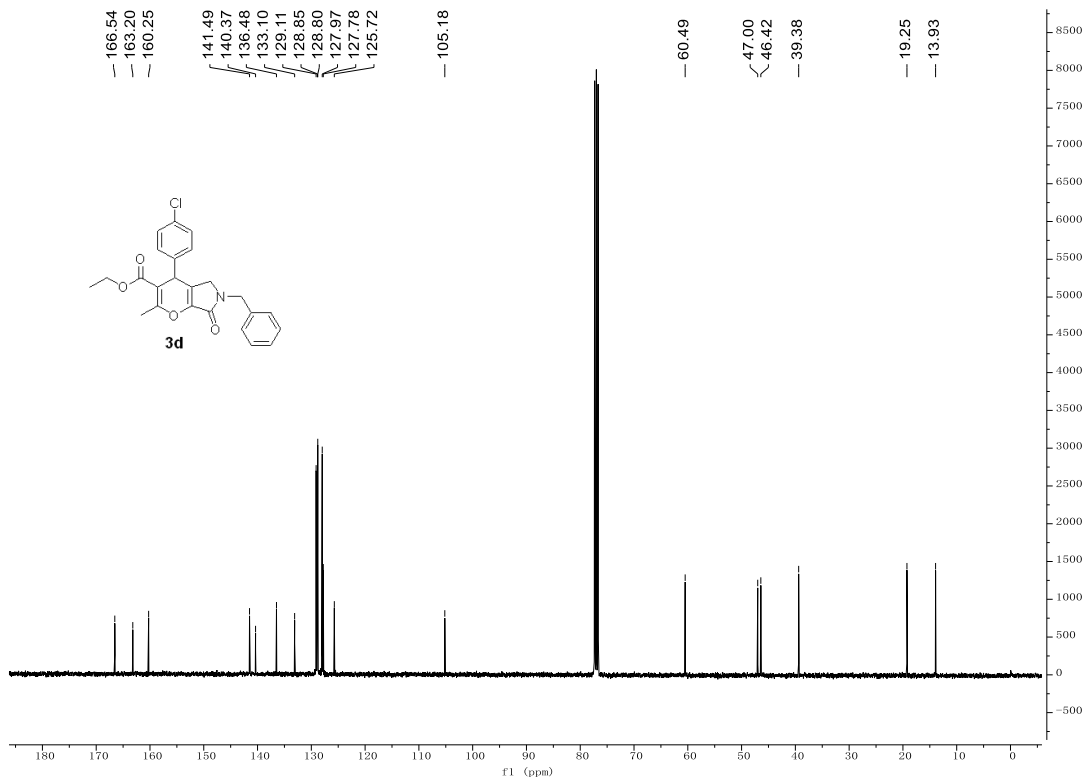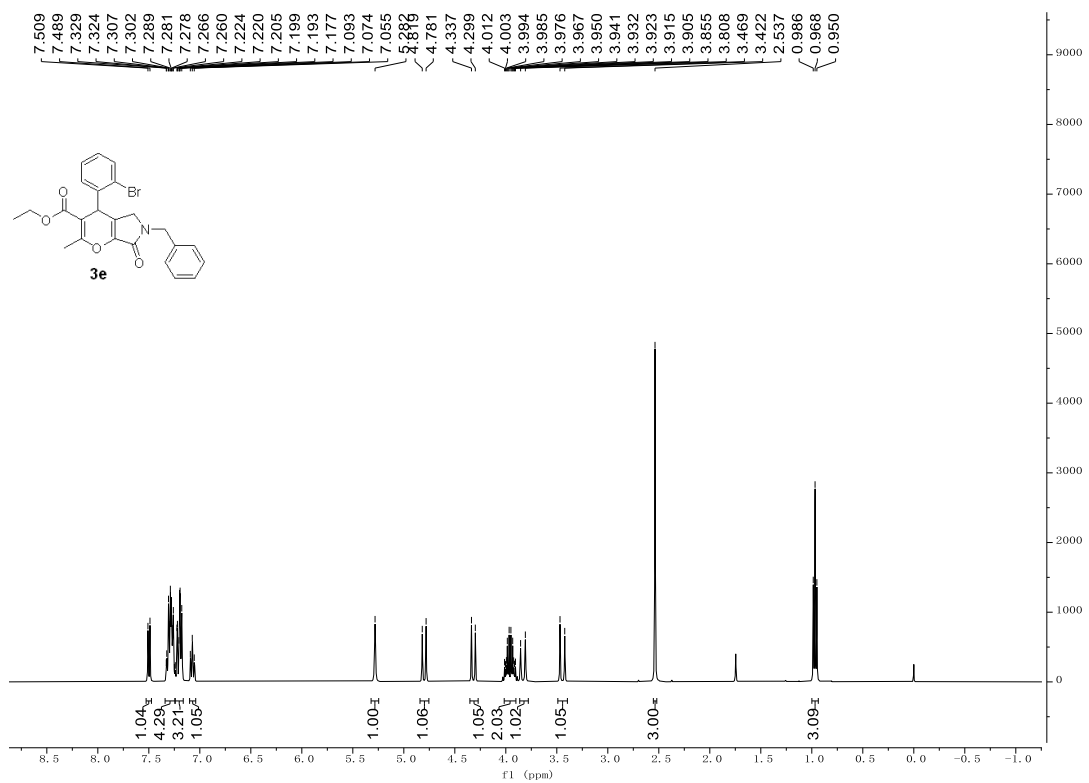

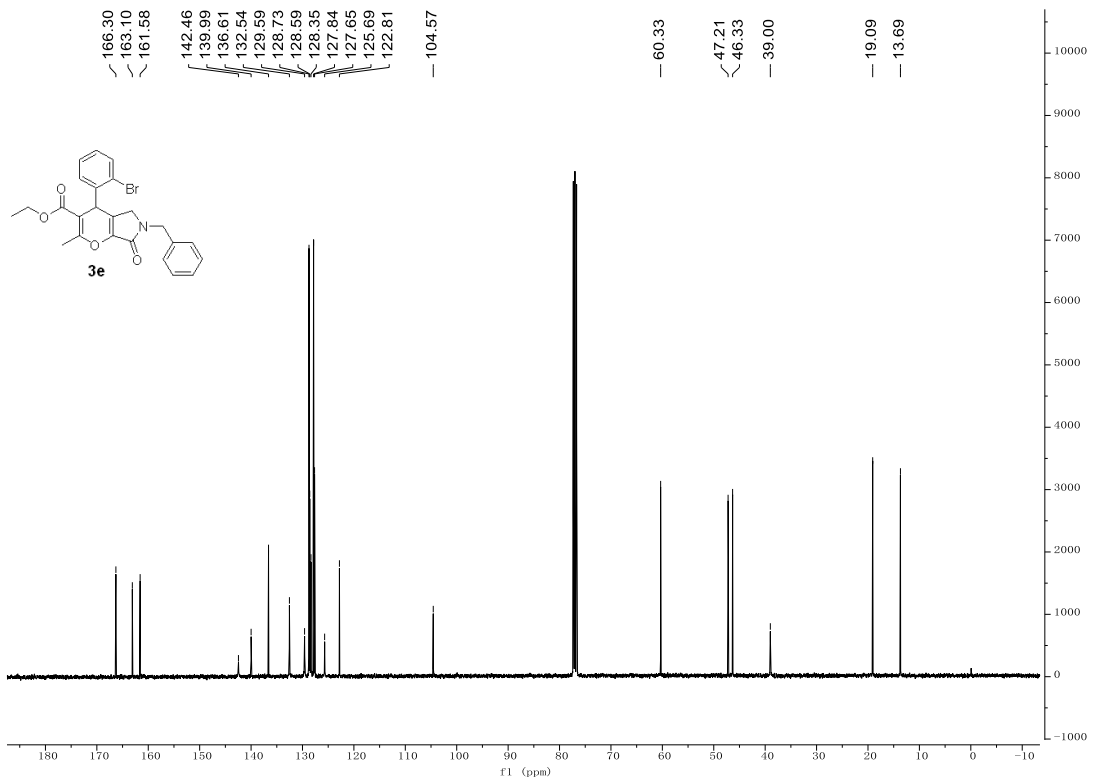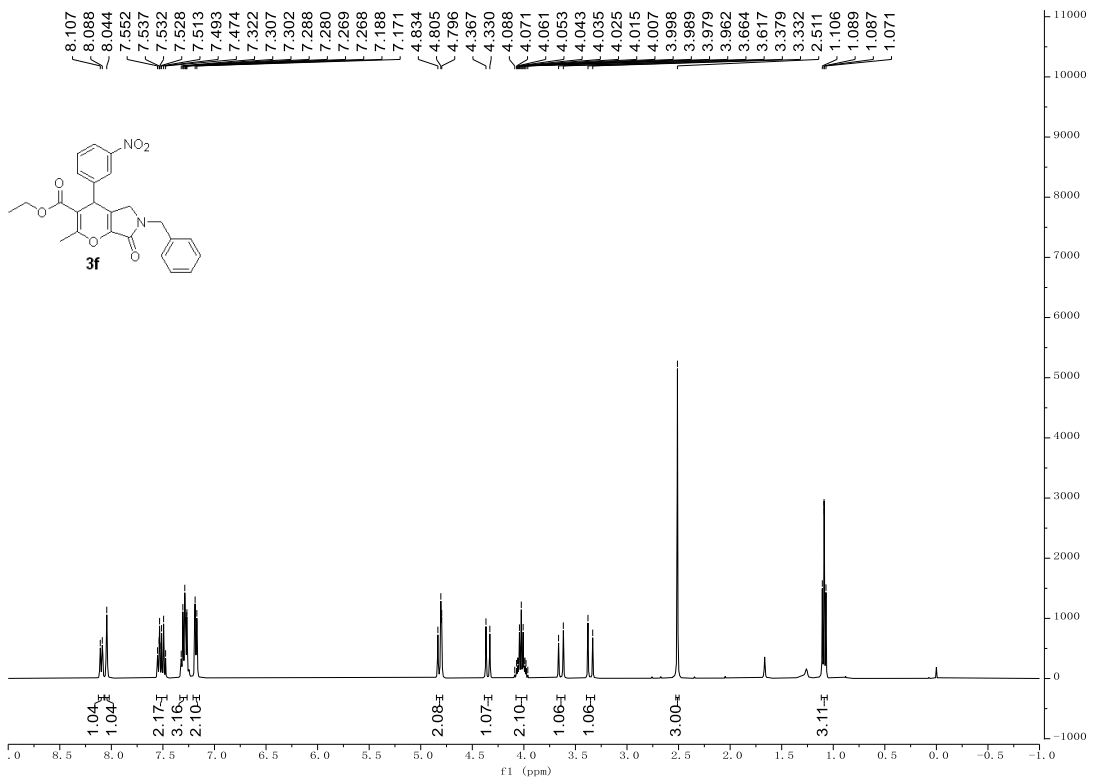



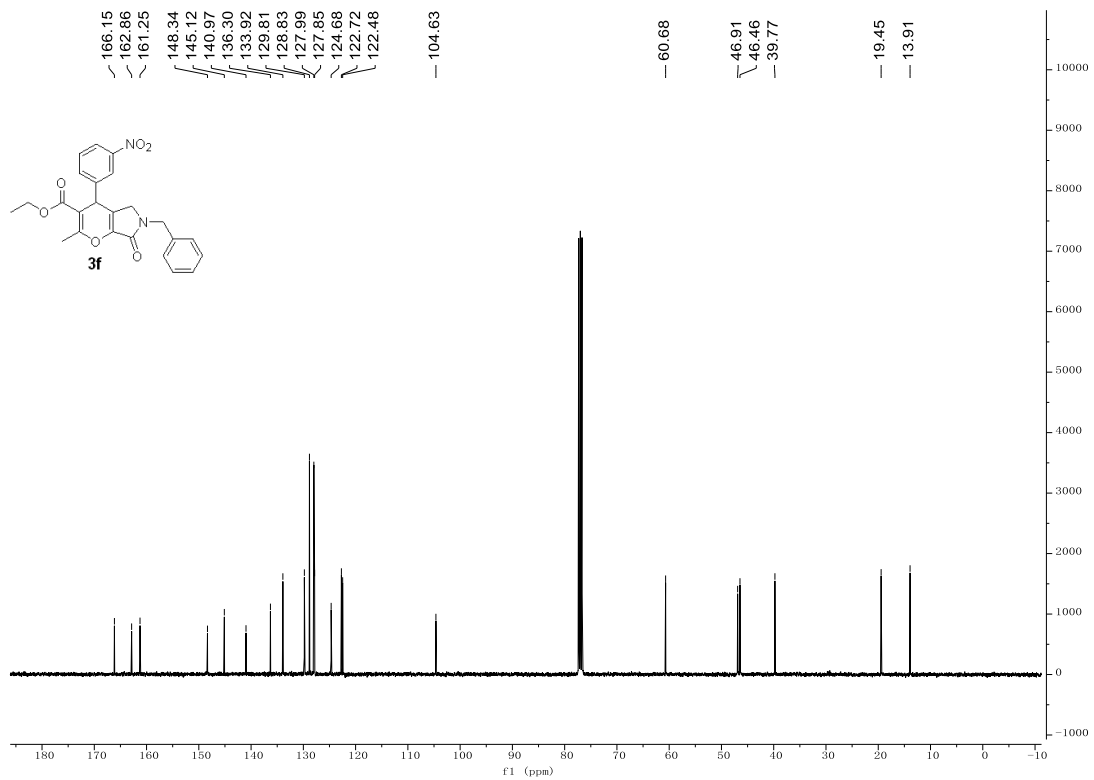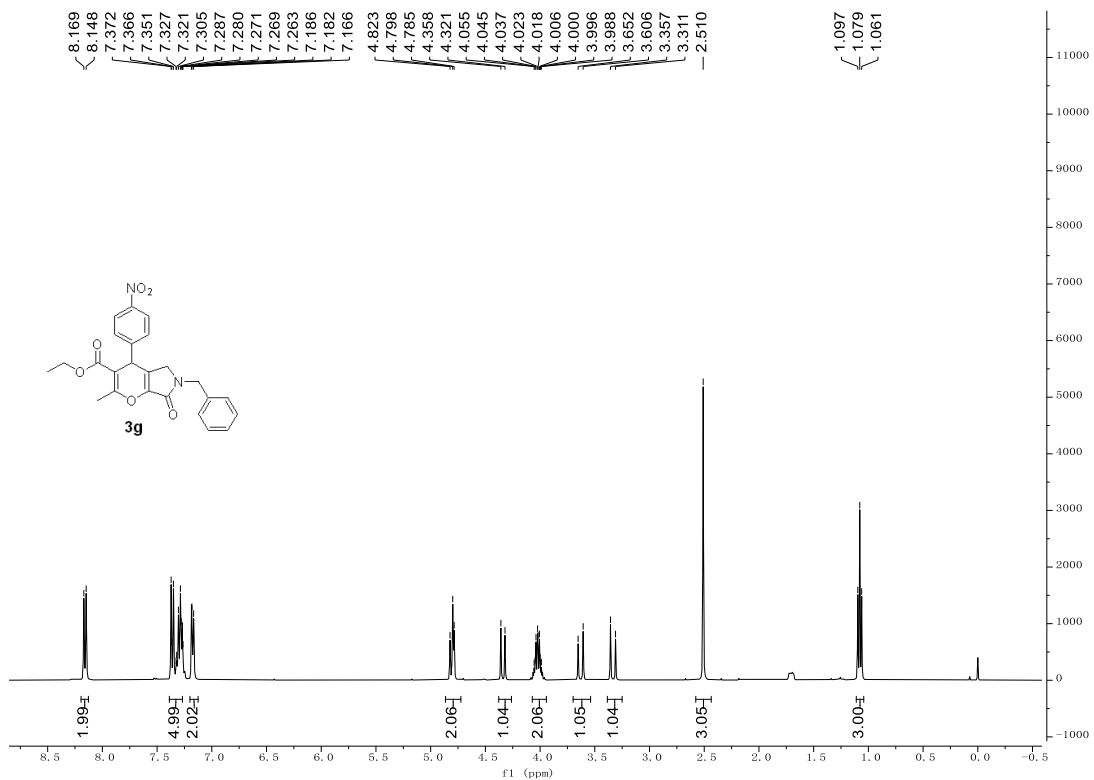

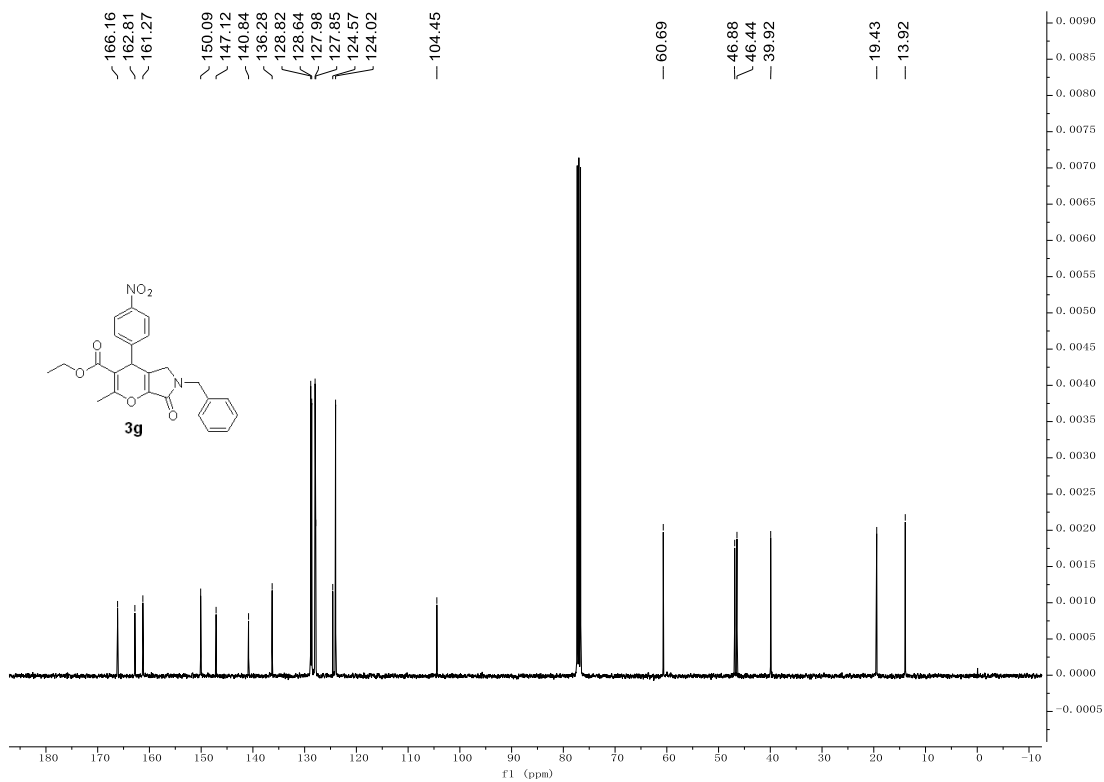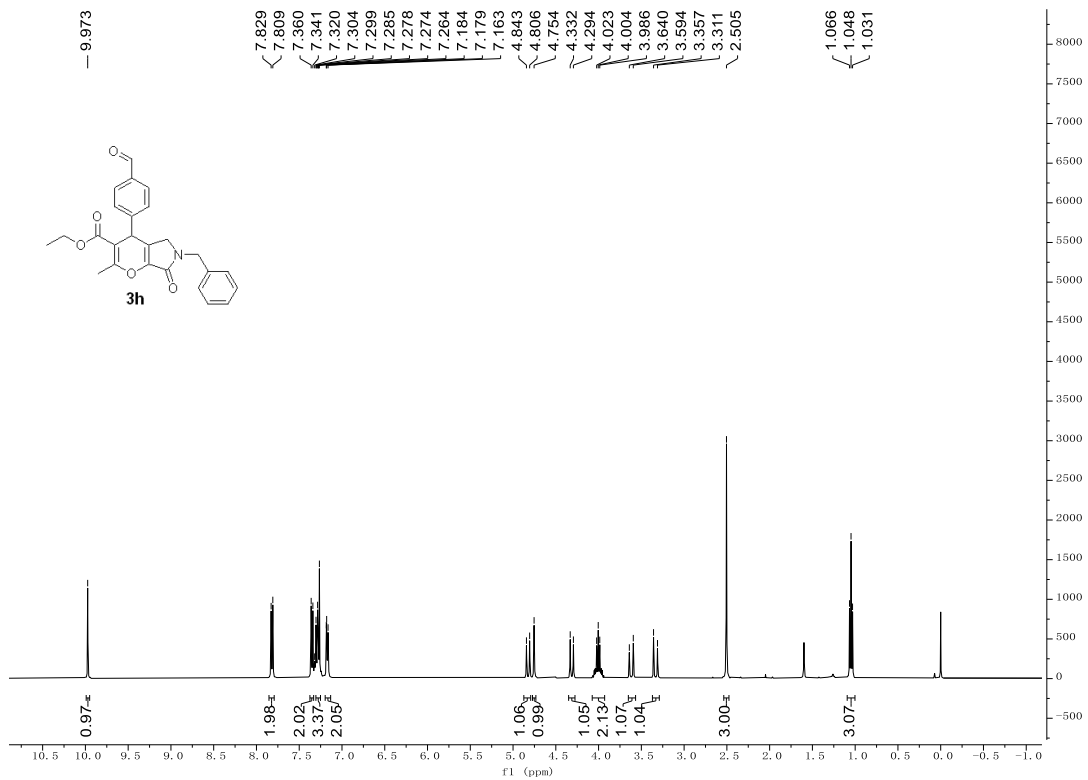

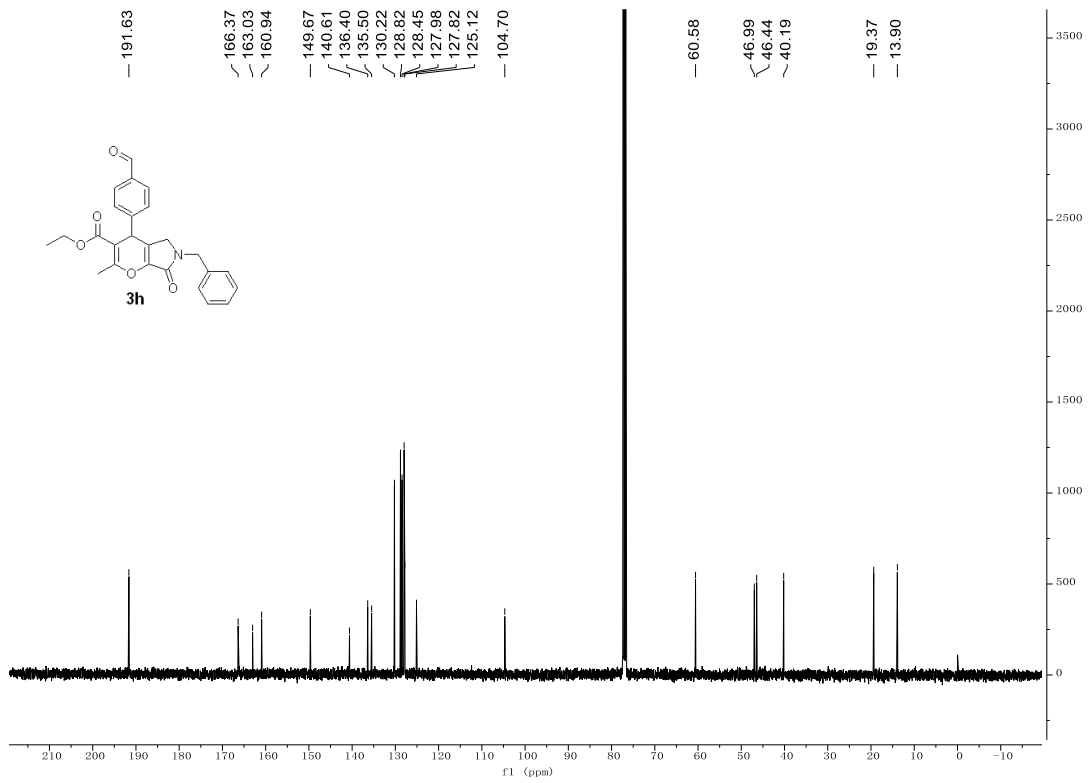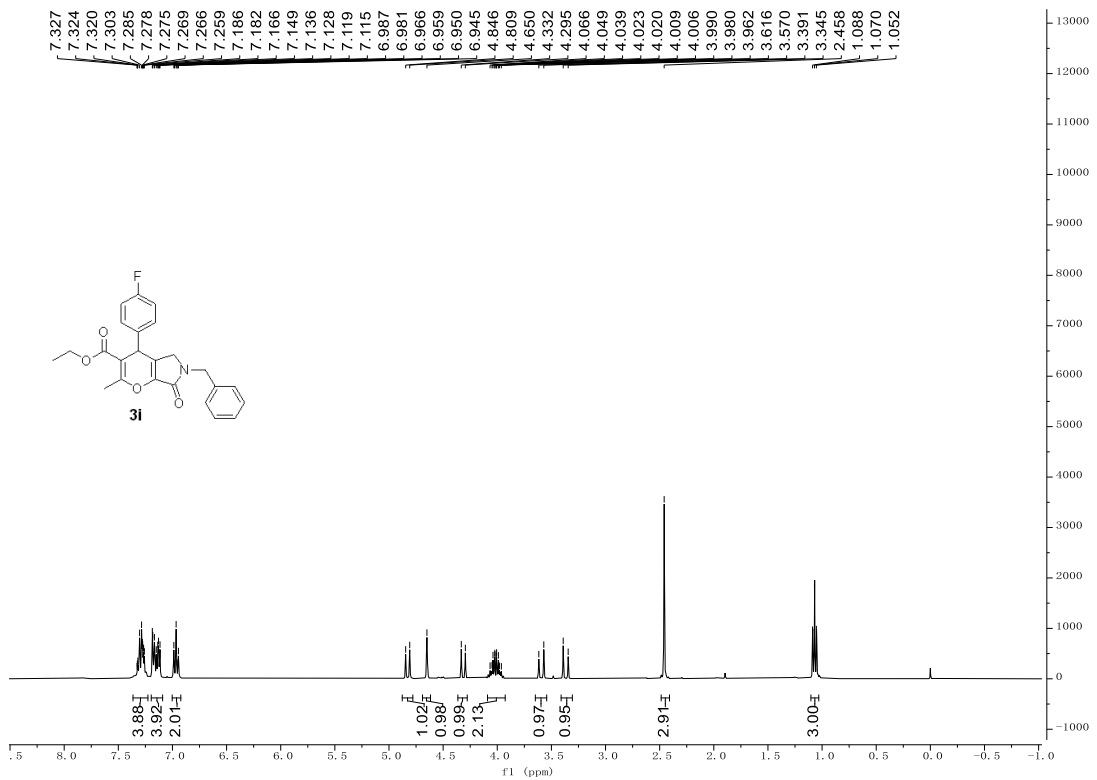

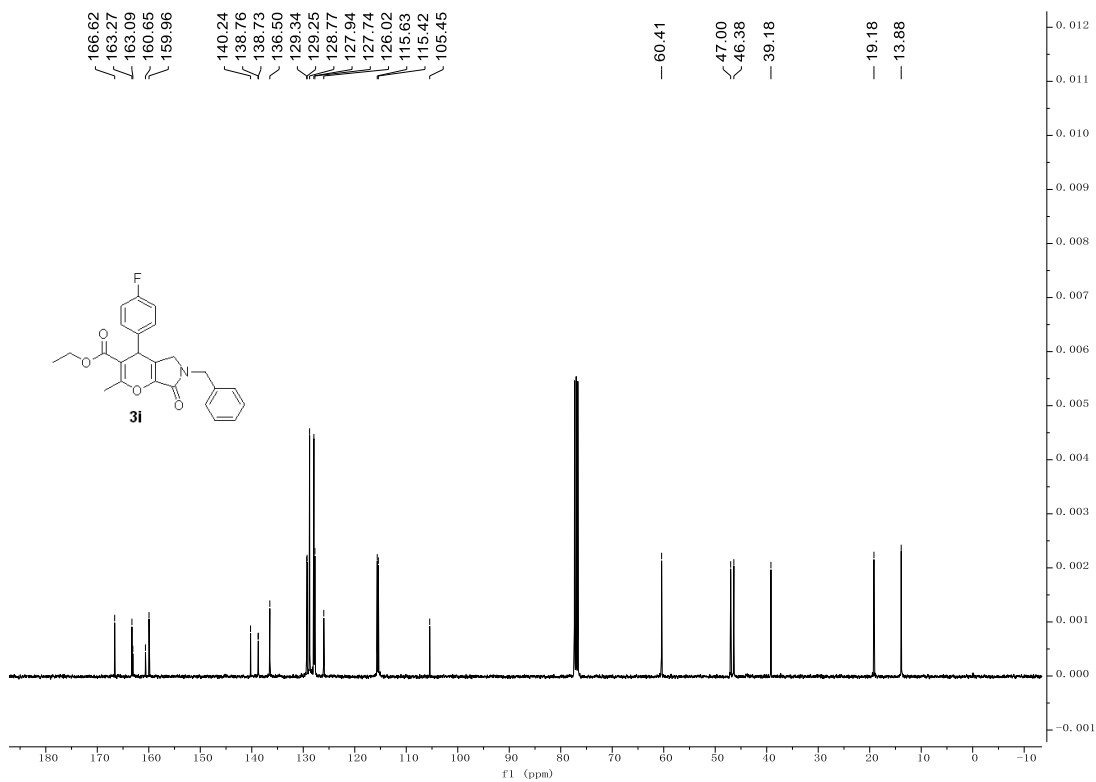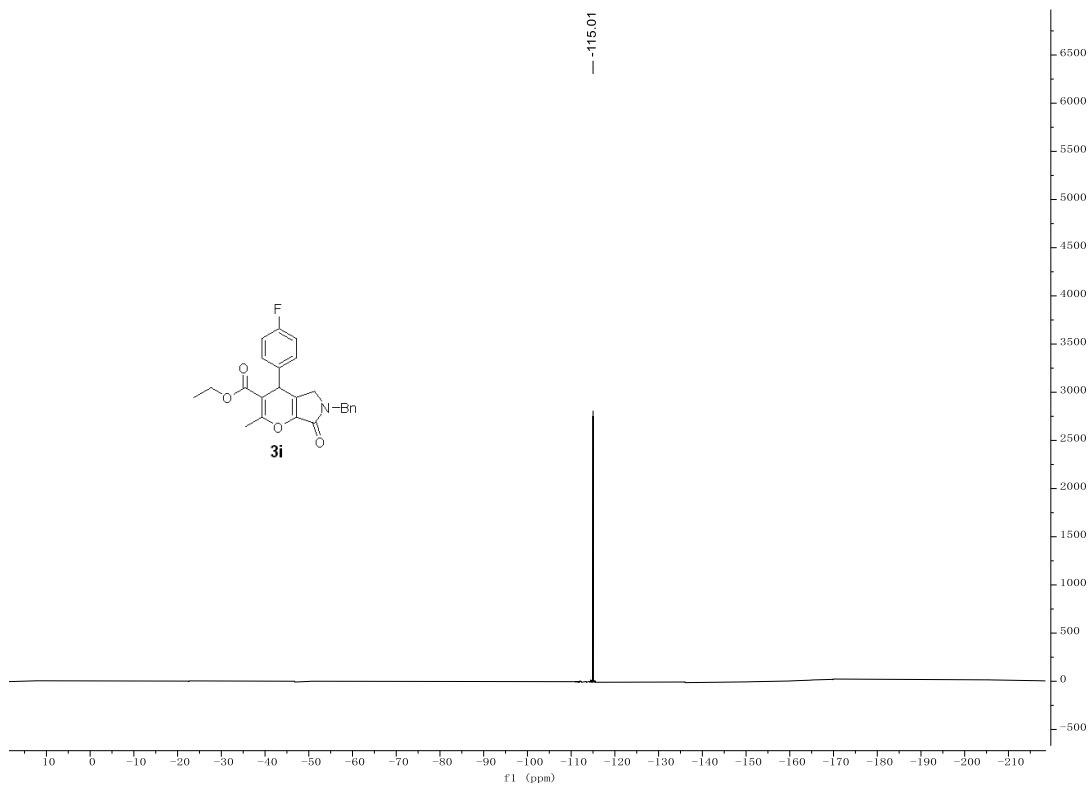

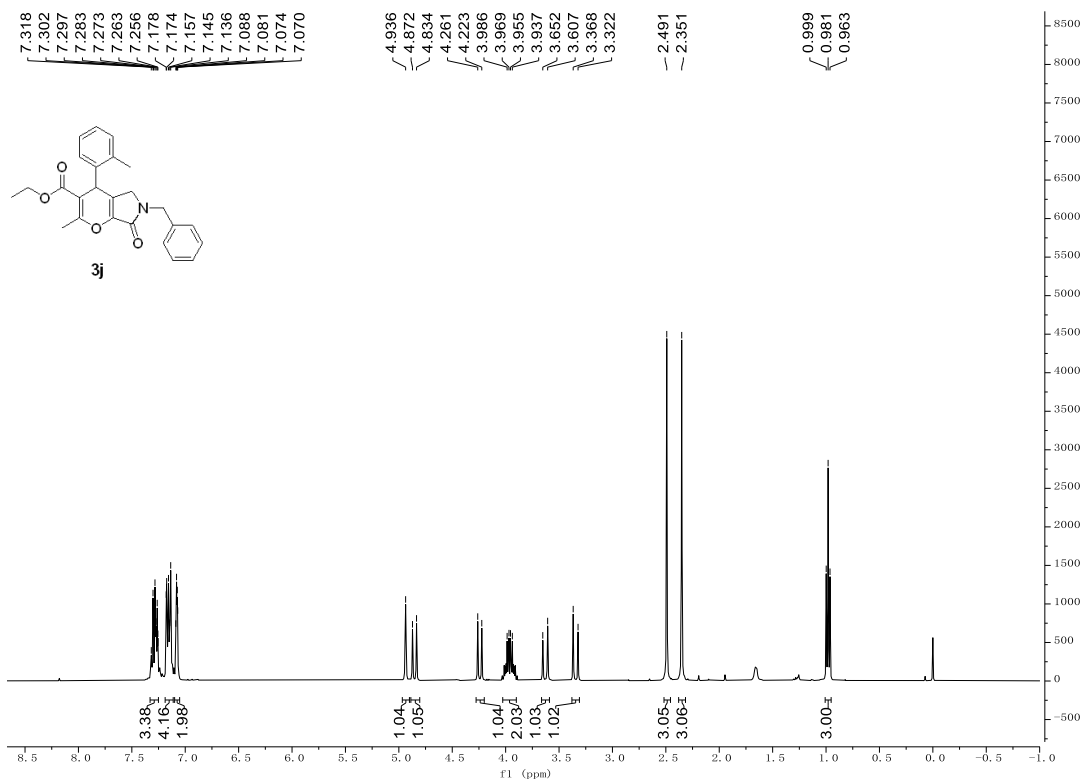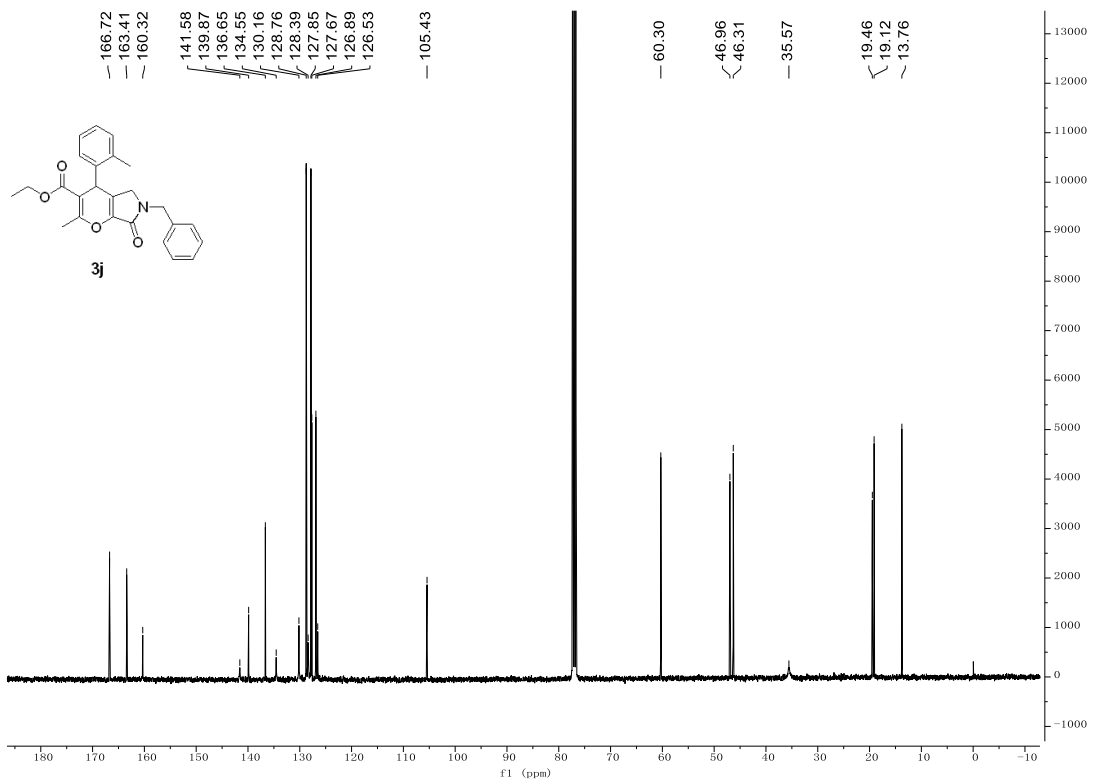

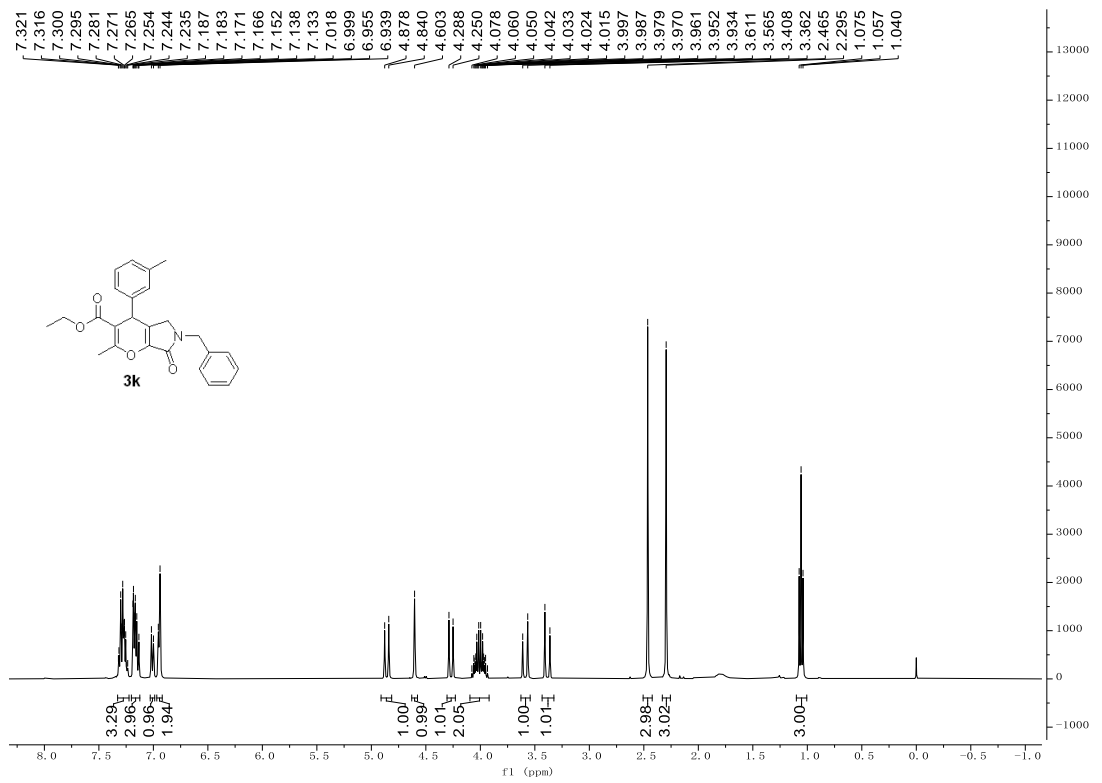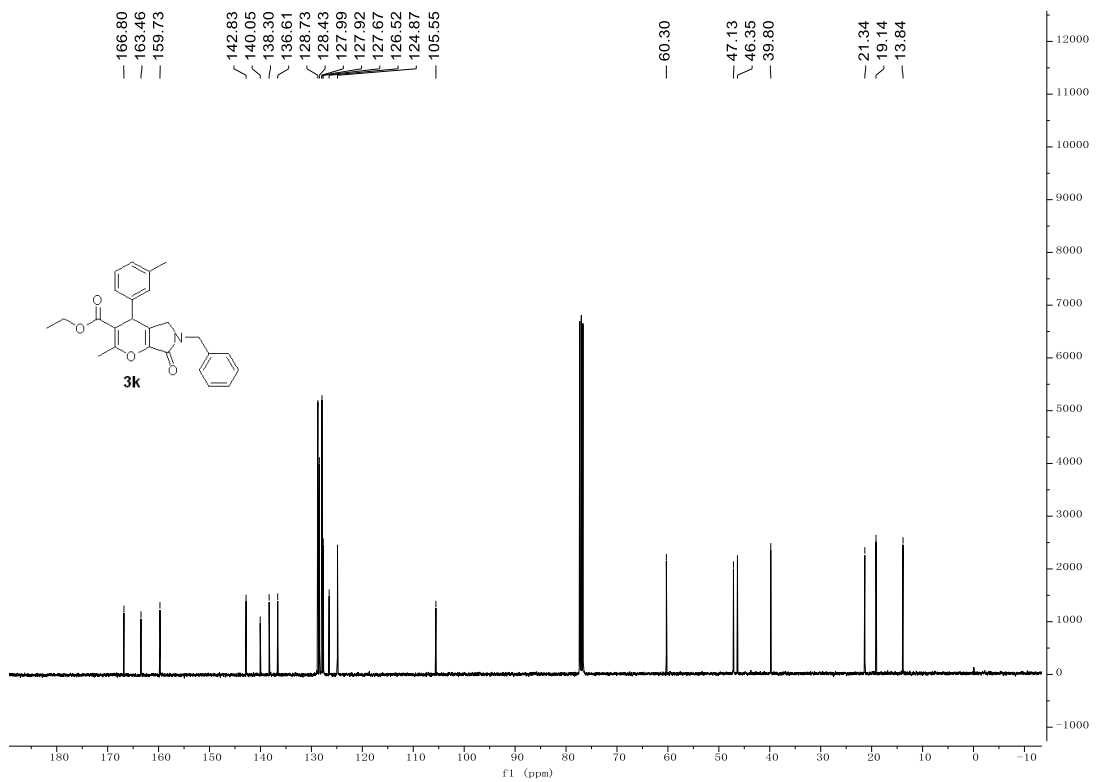

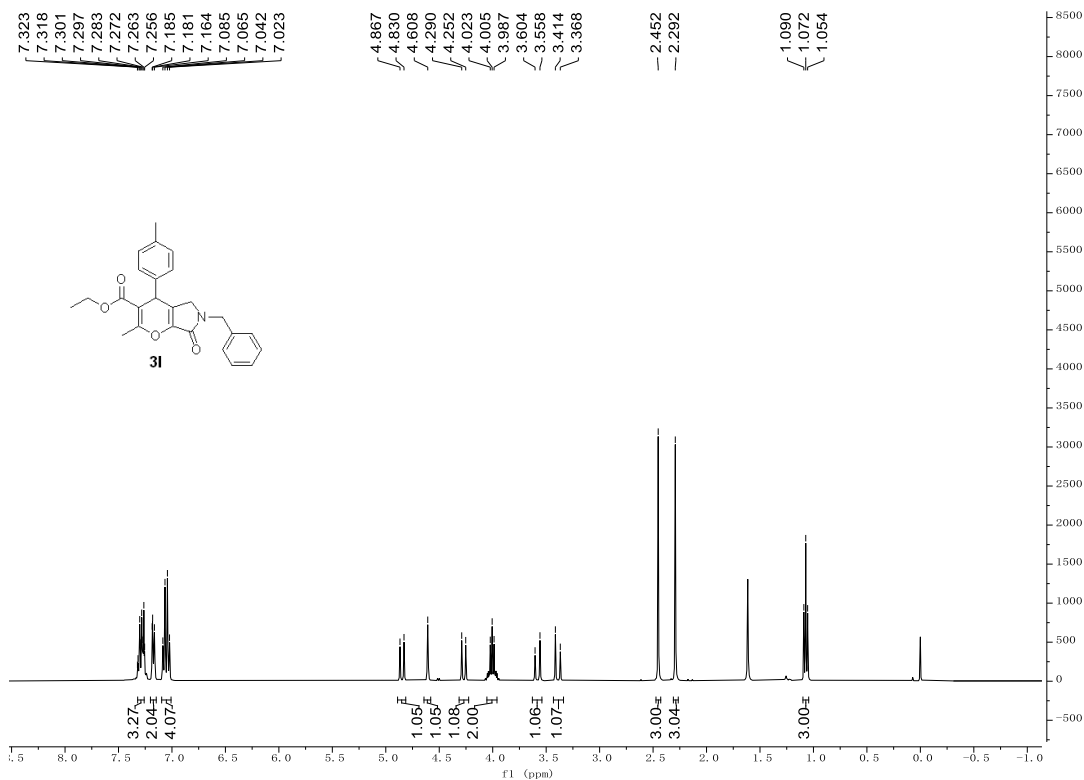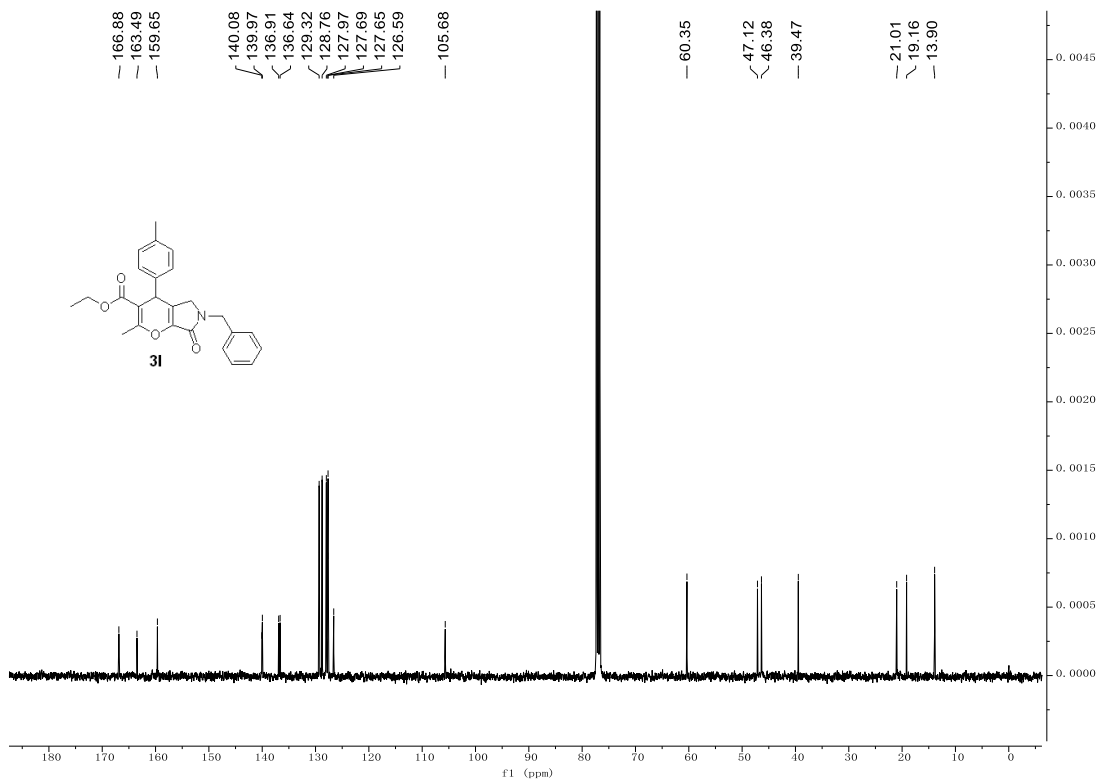

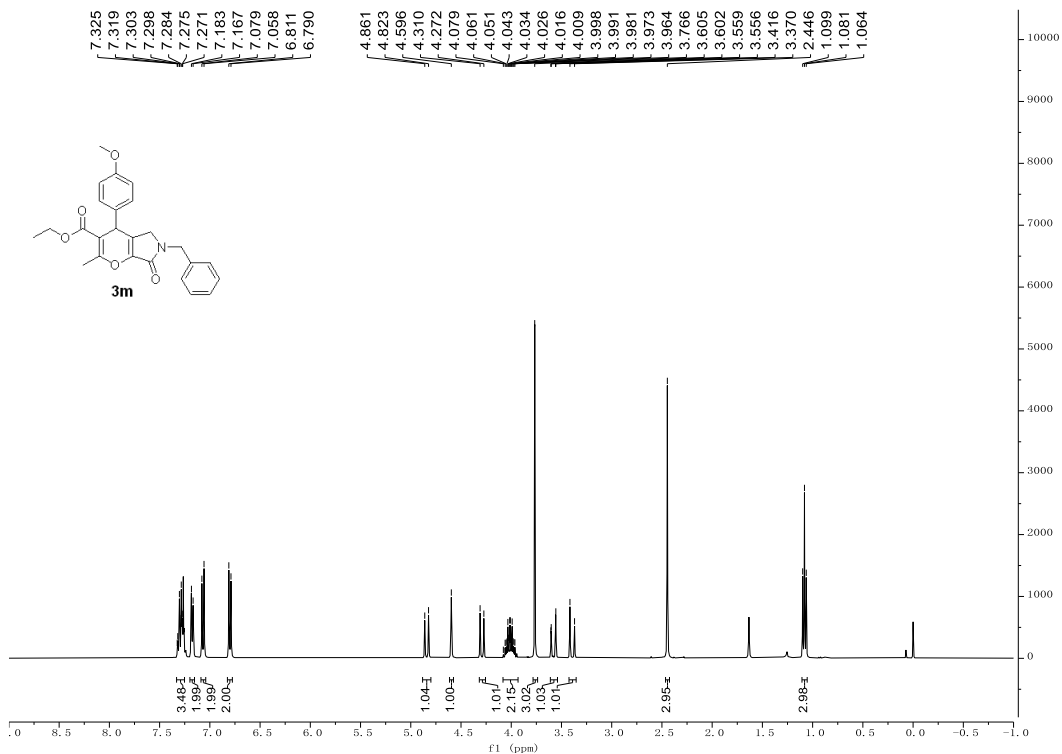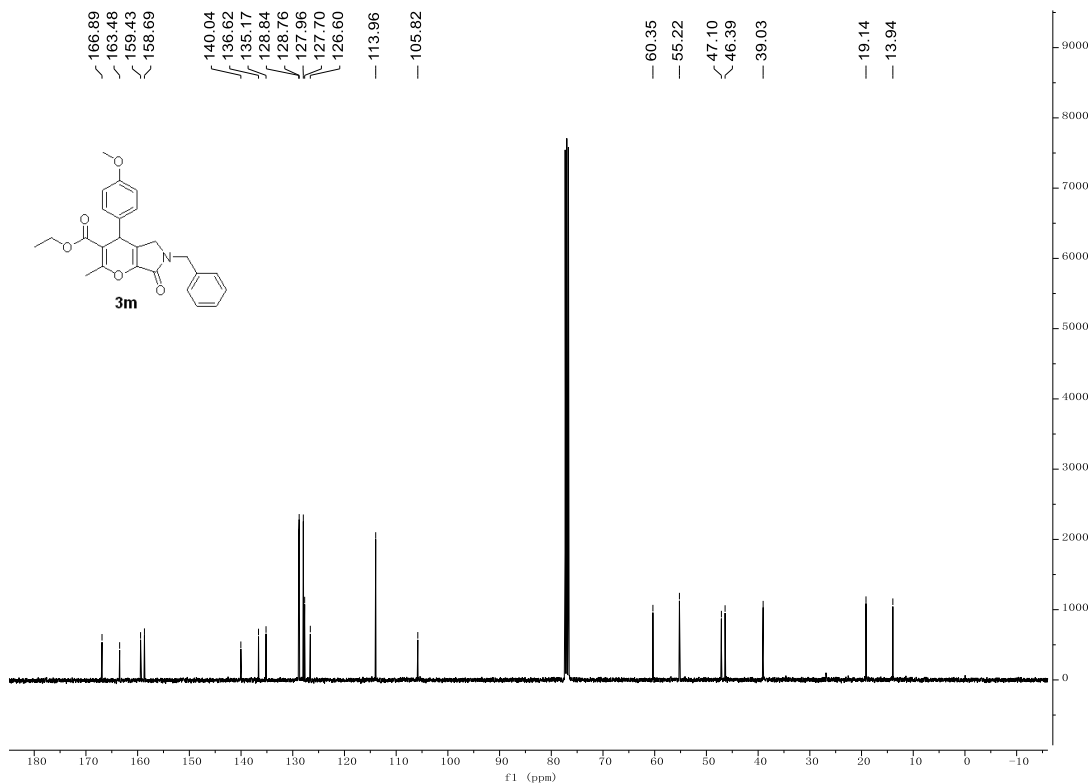



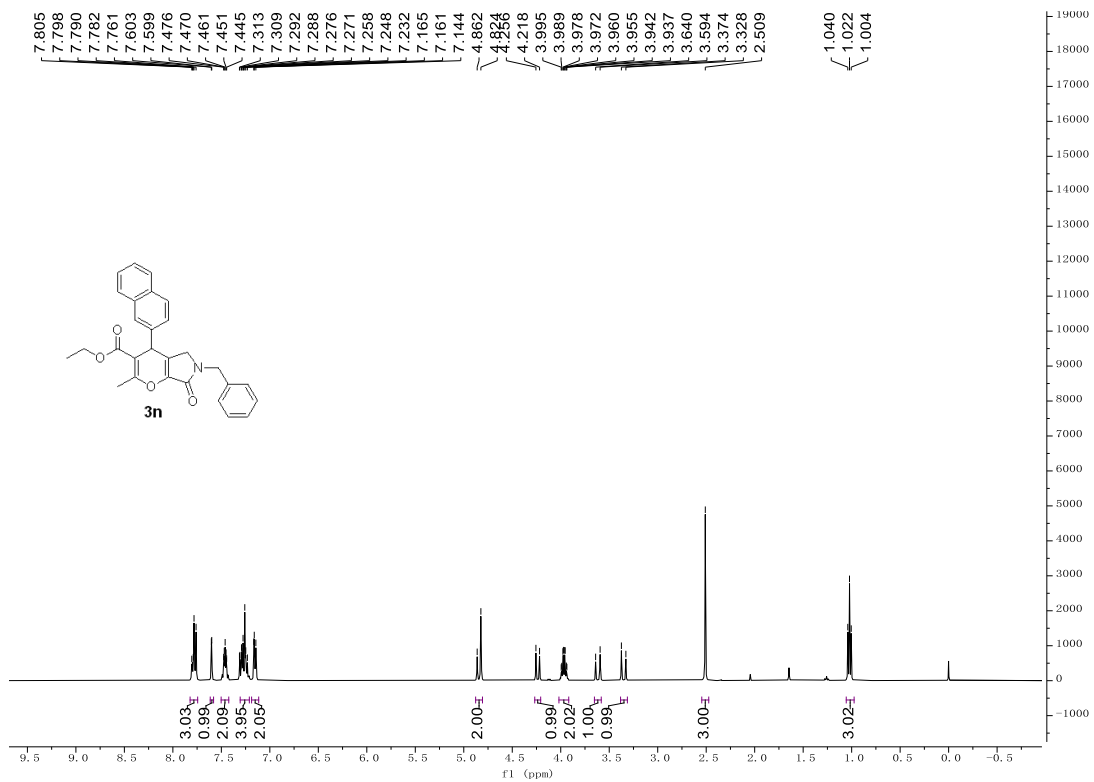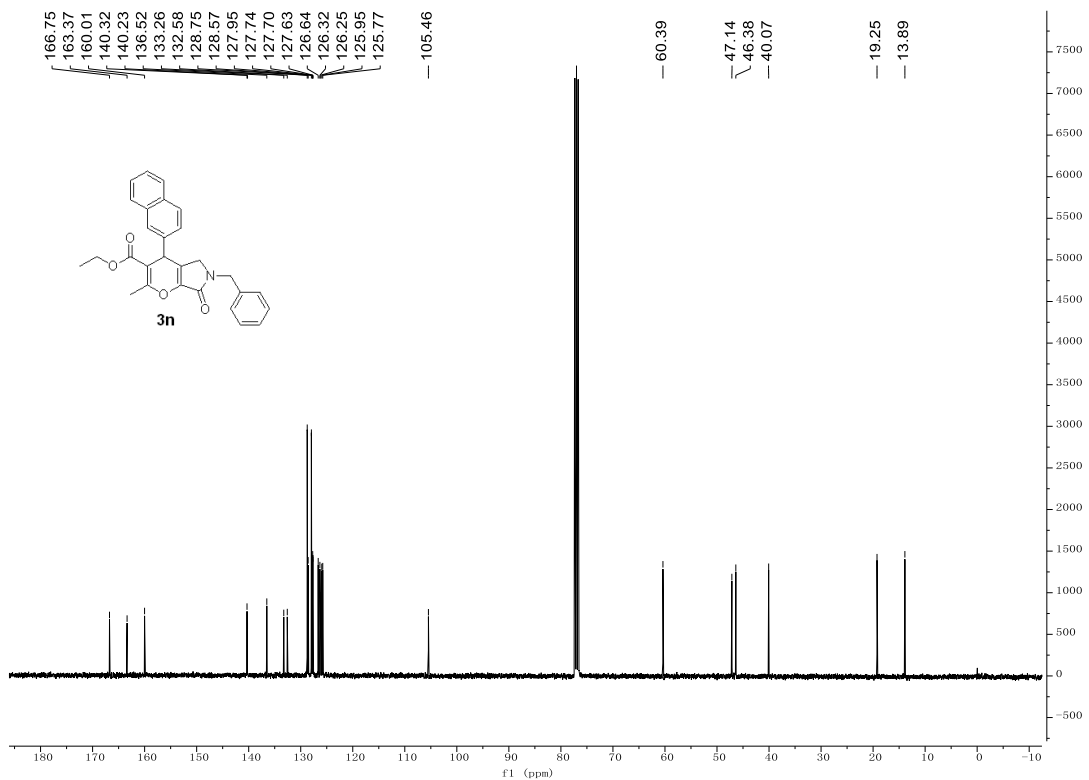

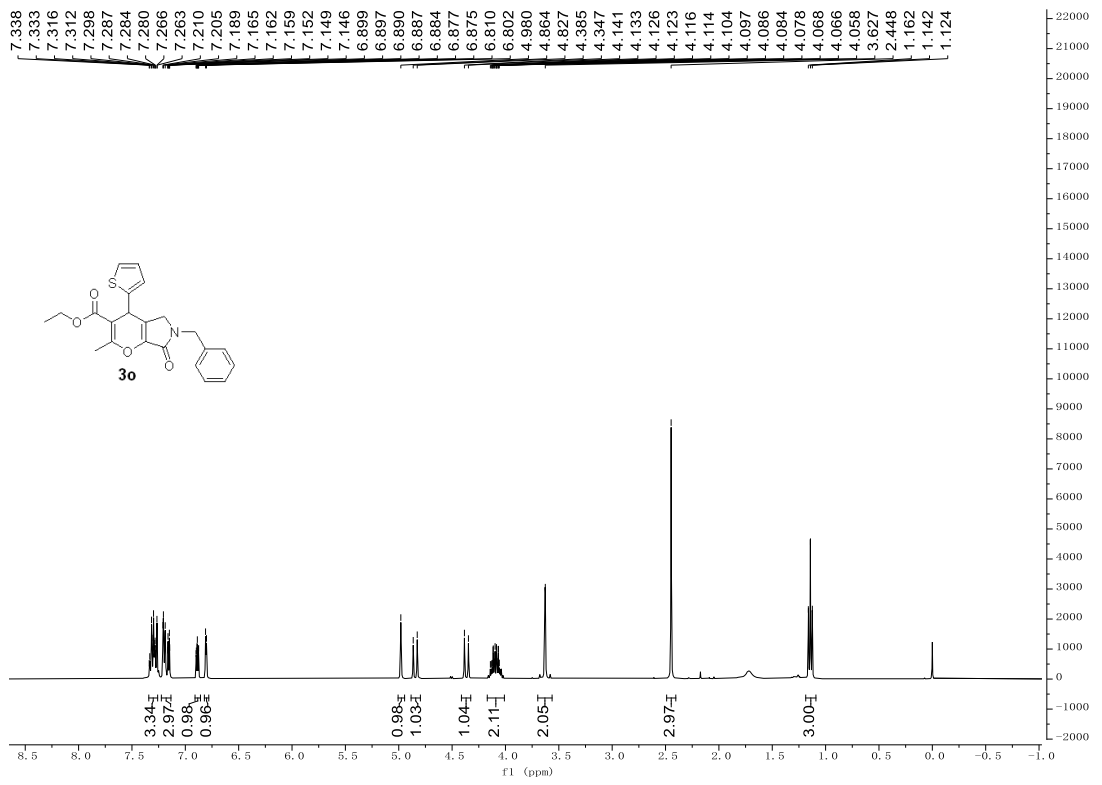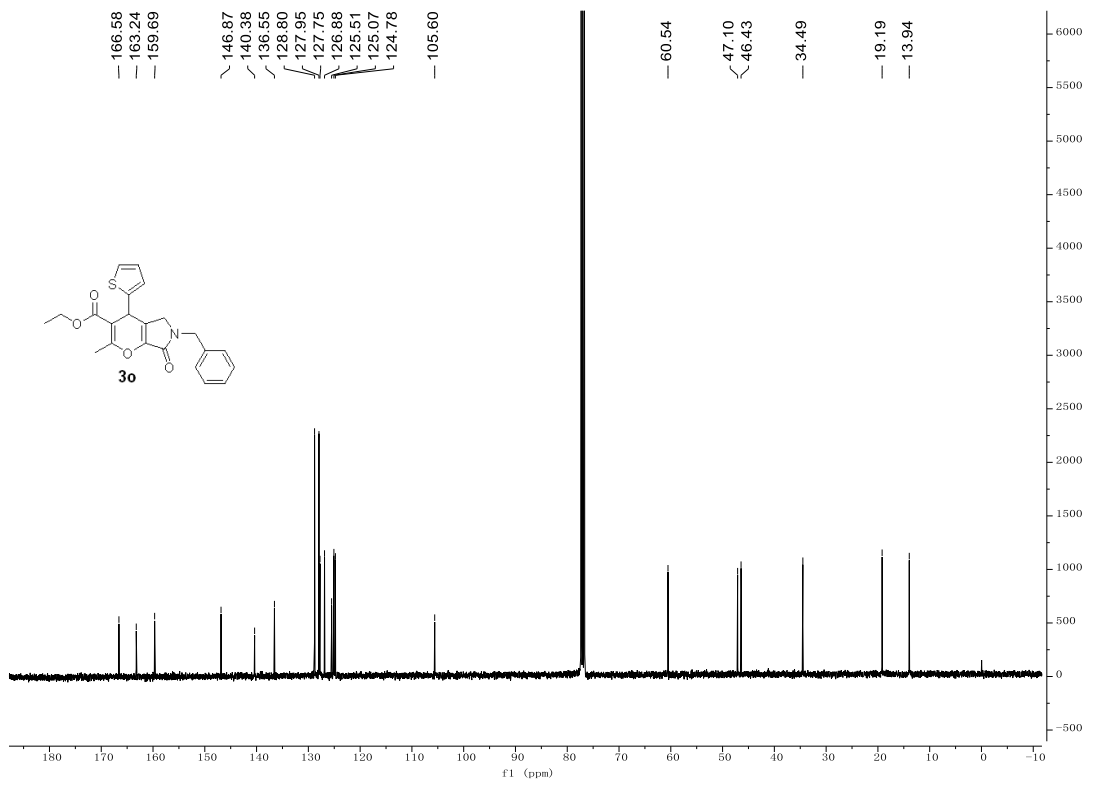

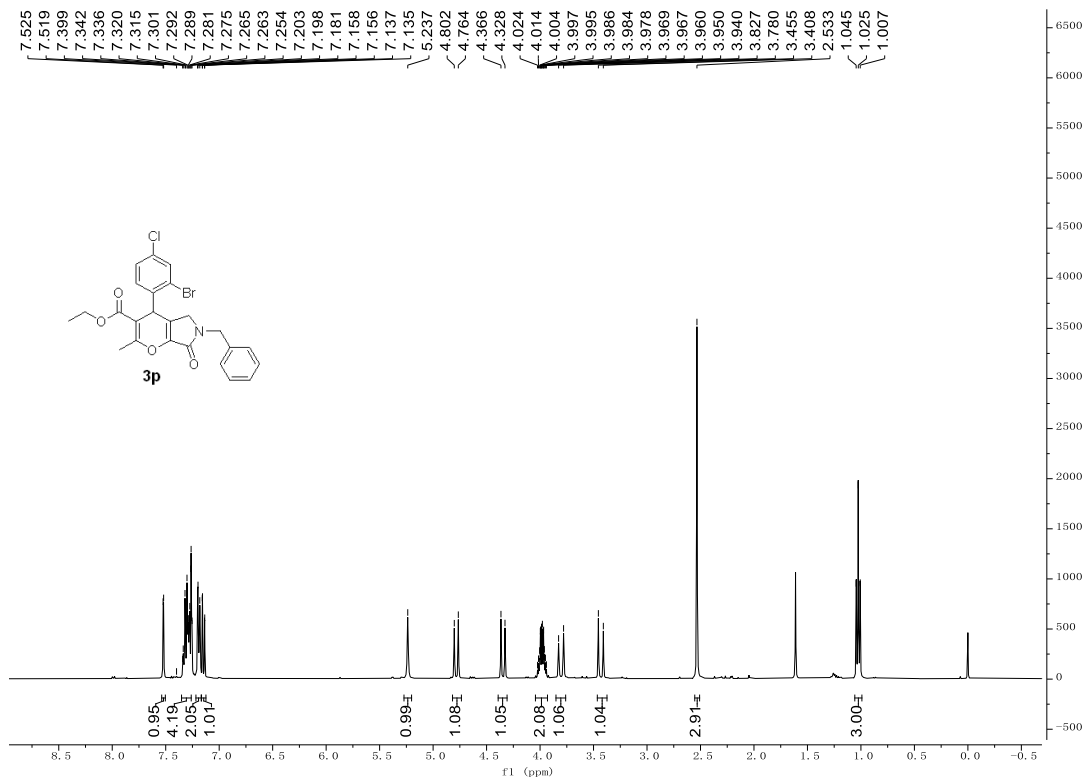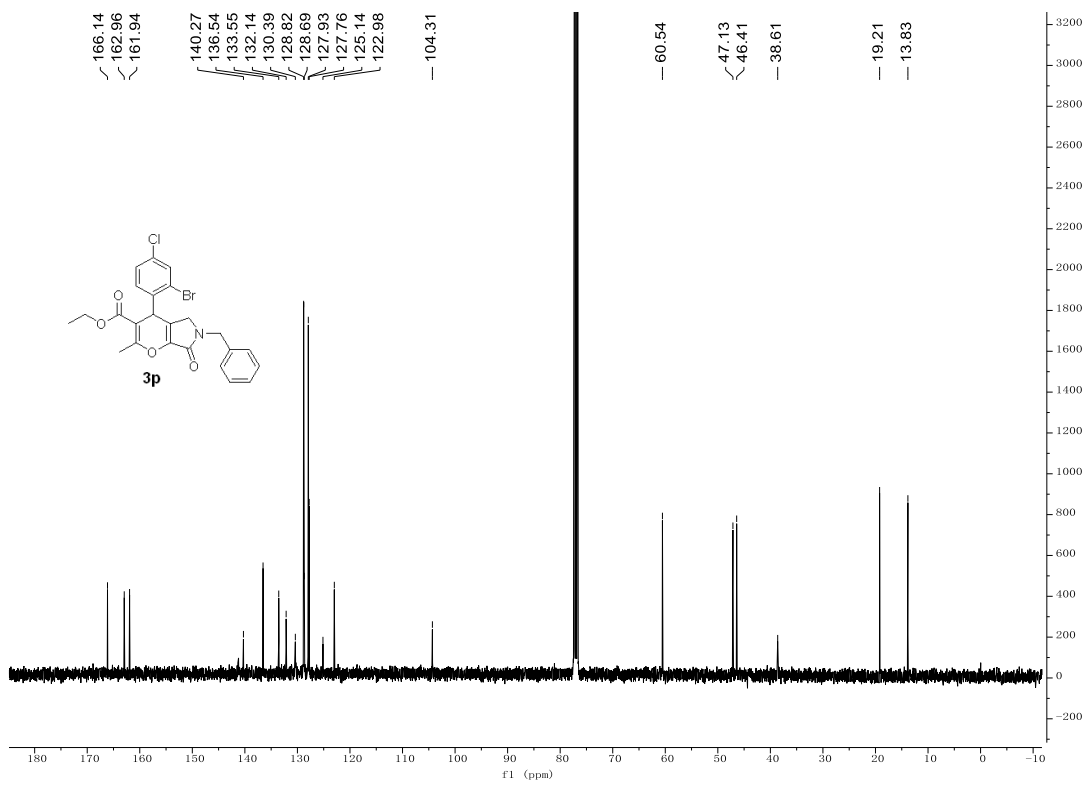

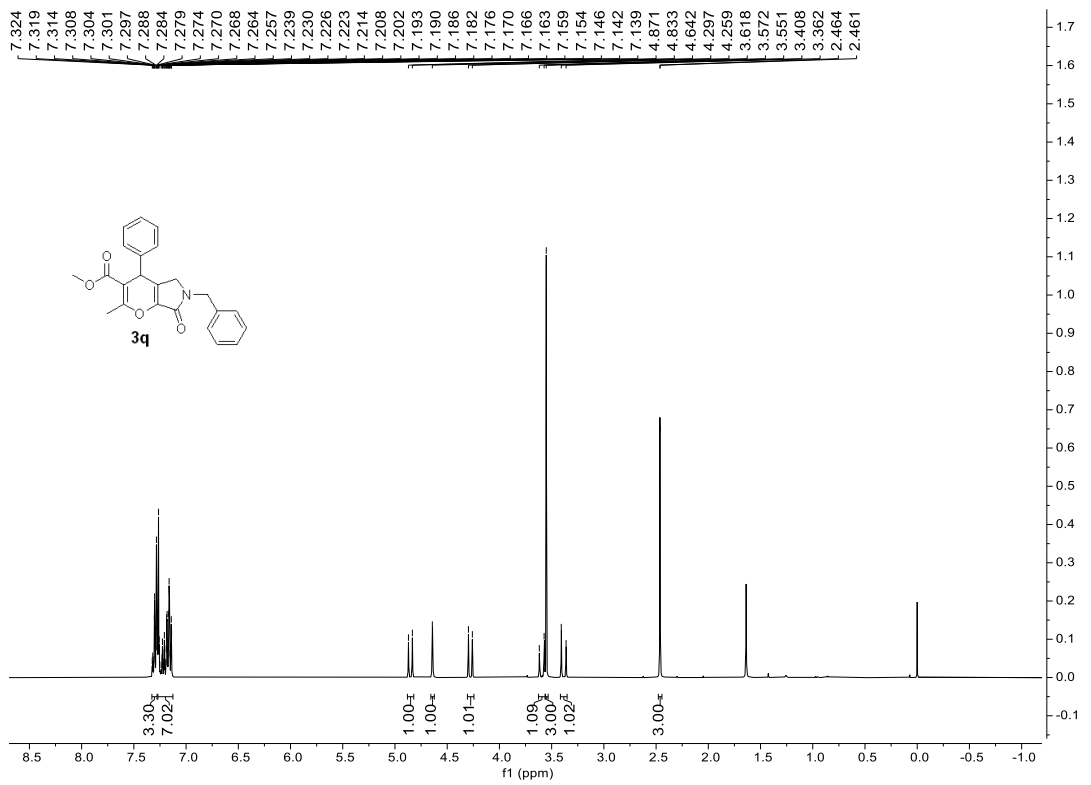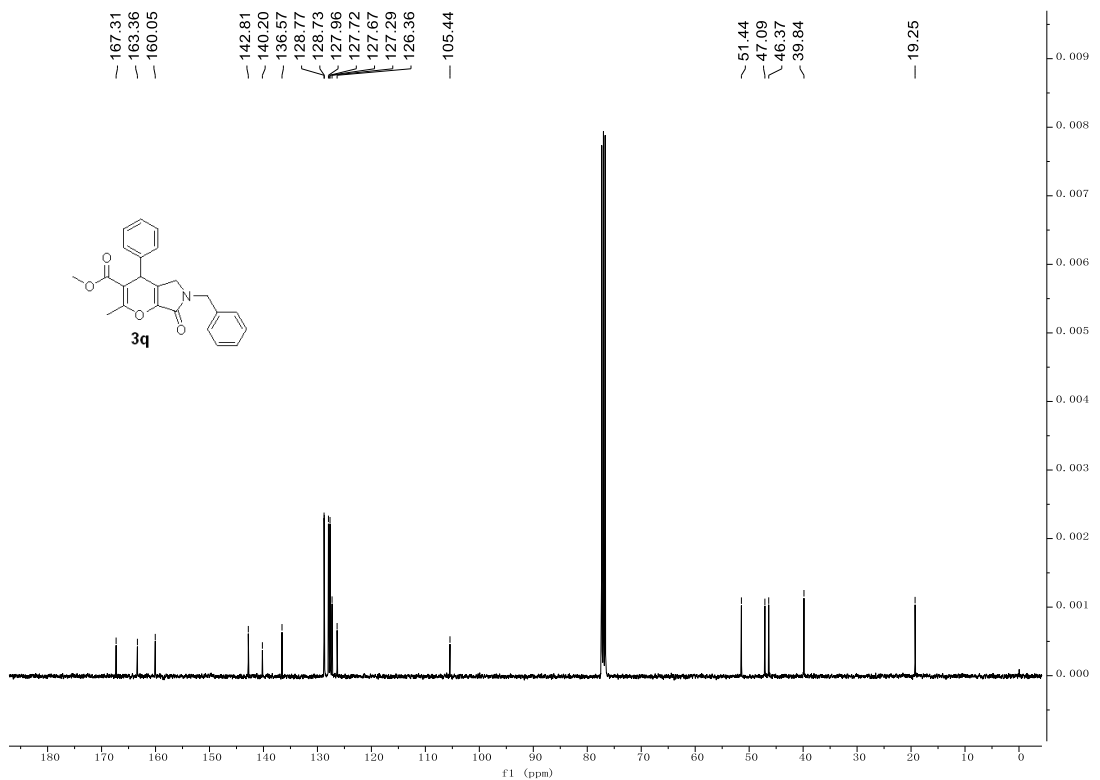

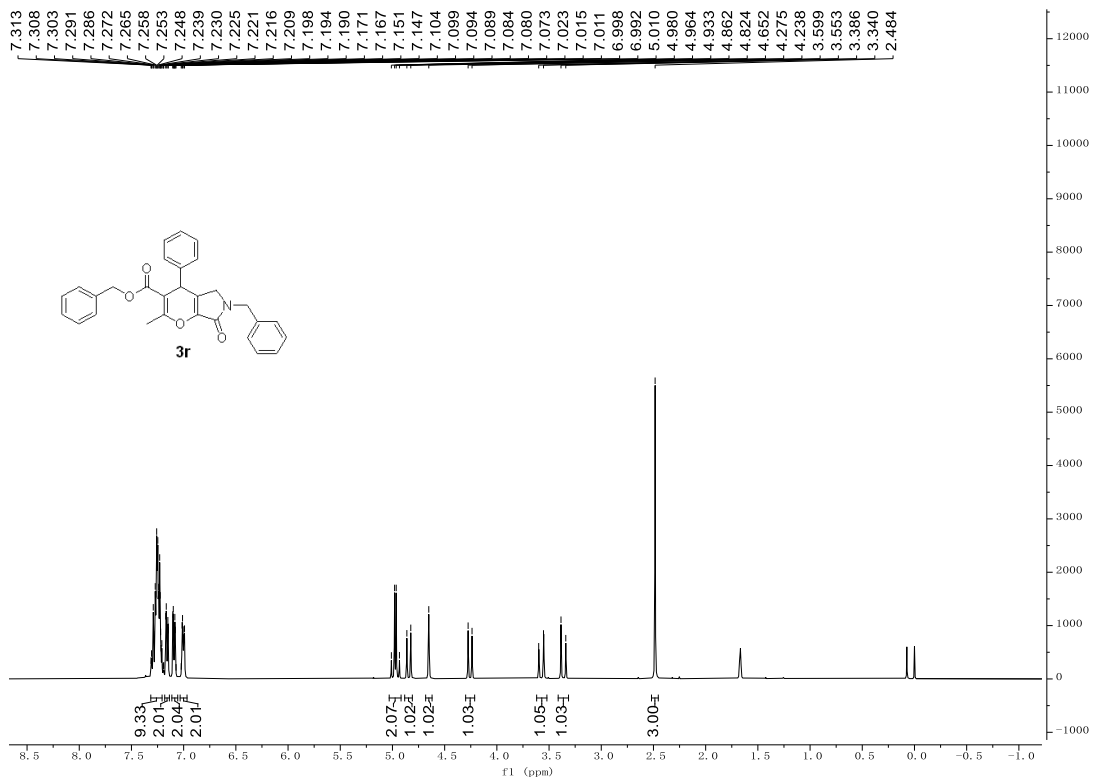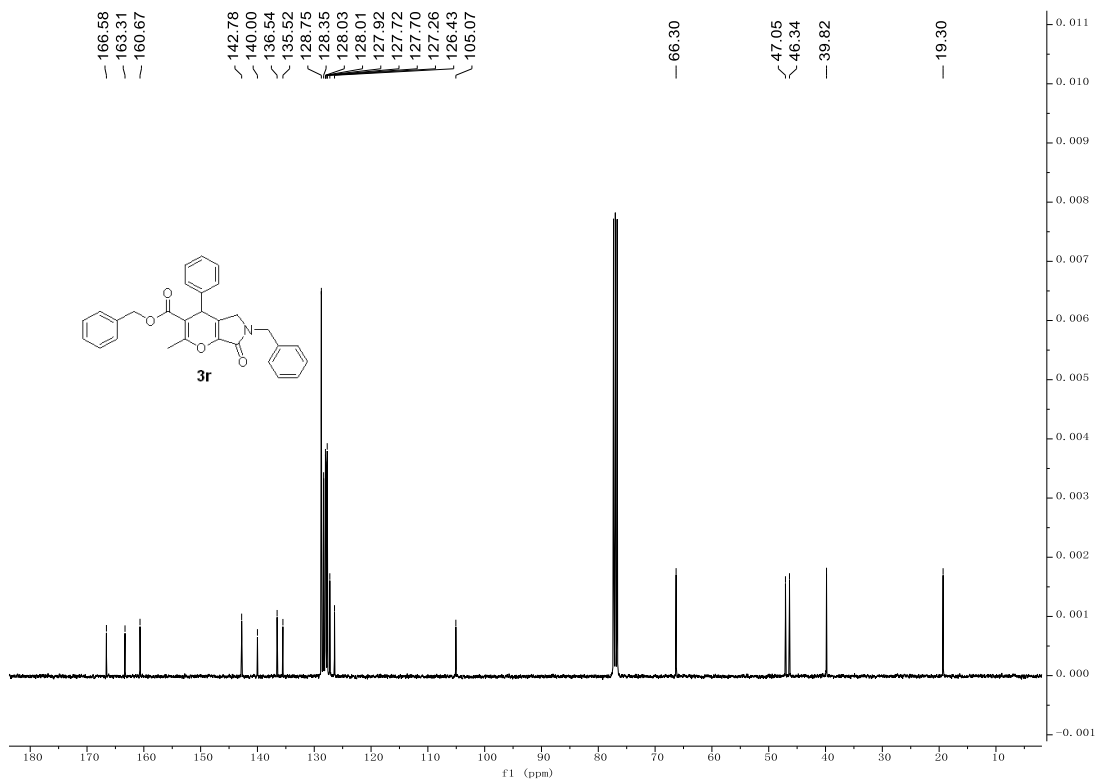

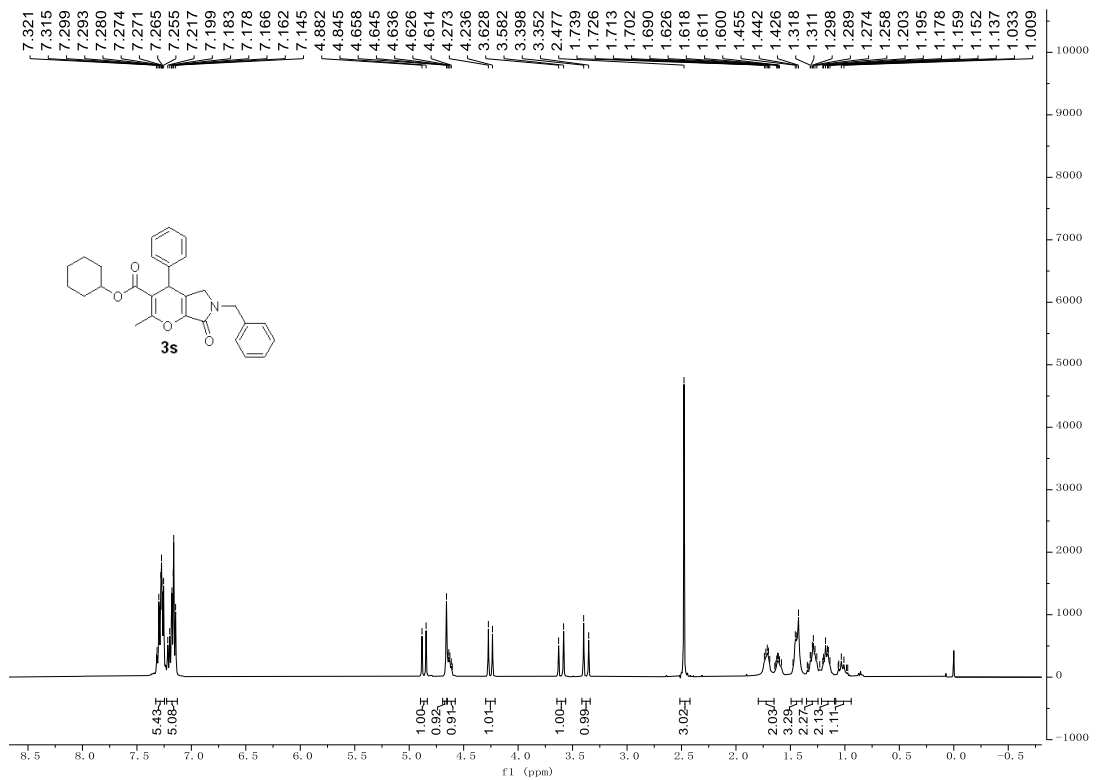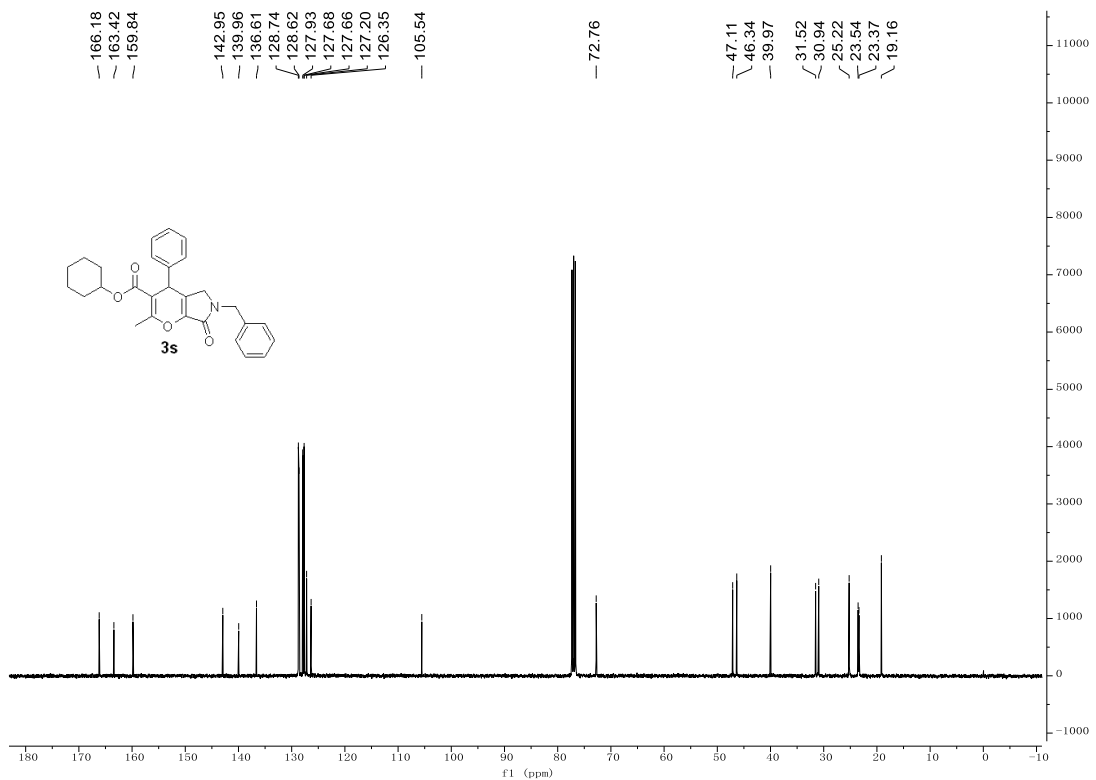

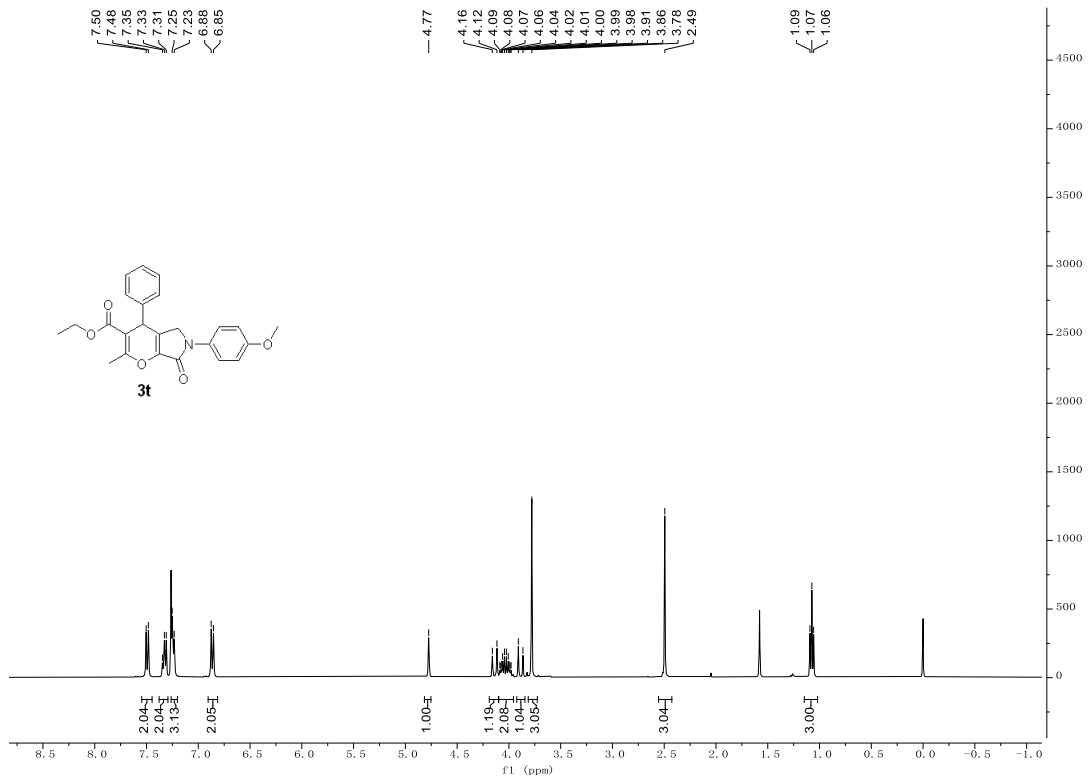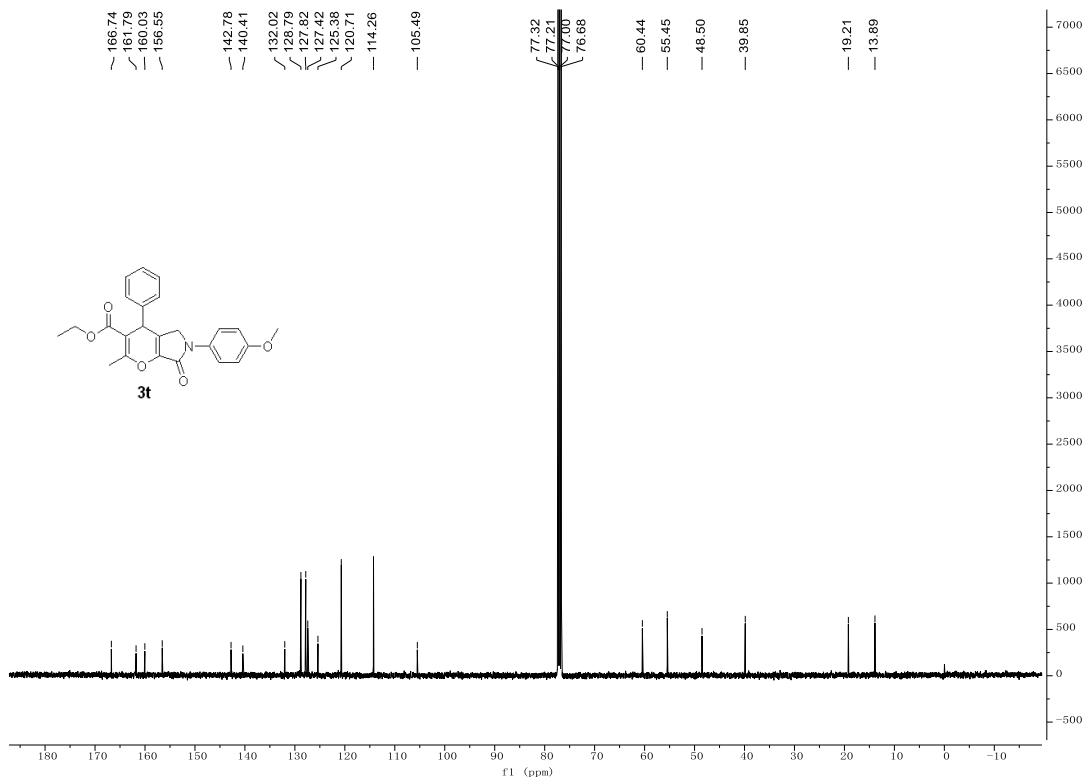

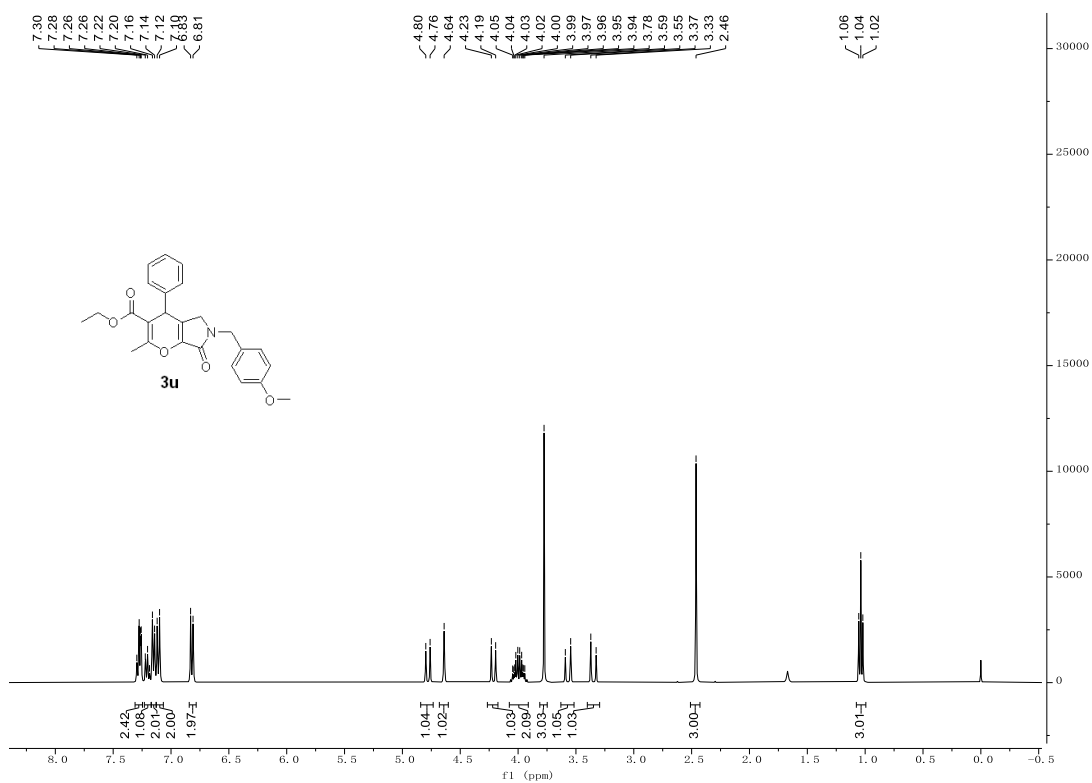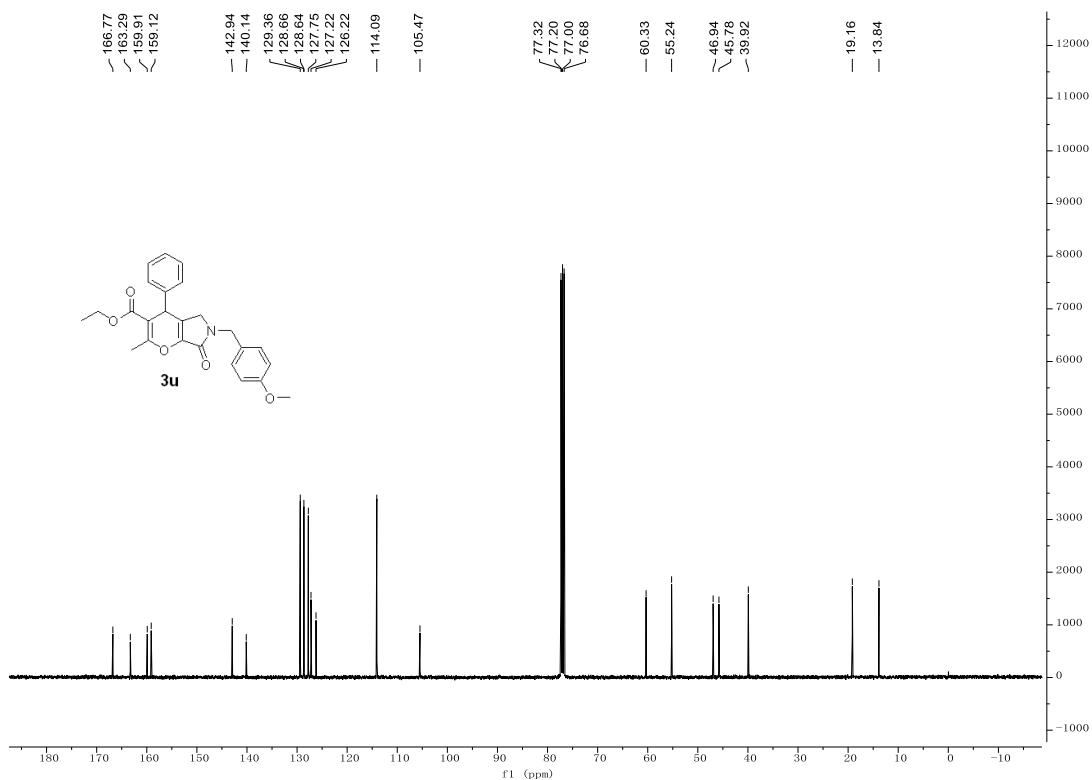



### 3 HPLC data of 3a

We measured the enantiomeric excess of several samples when chiral NHCs were employed. The enantiomeric excesses (ee) were determined by HPLC with a chiral IC column.

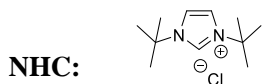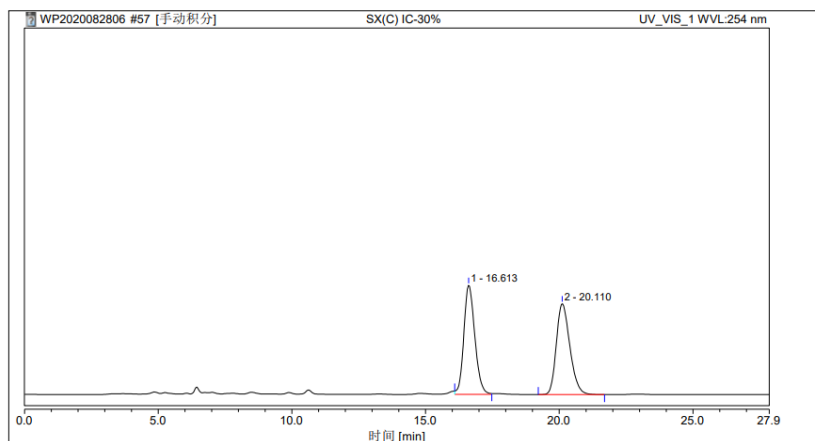

| Peak | Processed Channel | Retention Time (min) | Peak Area (mAU*min) | Peak Height (mAU) | Peak Area (%) |
|------|-------------------|----------------------|---------------------|-------------------|---------------|
| 1    | DAD 245.0 nm      | 16.613               | 94.119              | 196.830           | 49.47         |
| 2    | DAD 245.0 nm      | 20.110               | 96.117              | 163.787           | 50.53         |

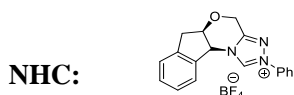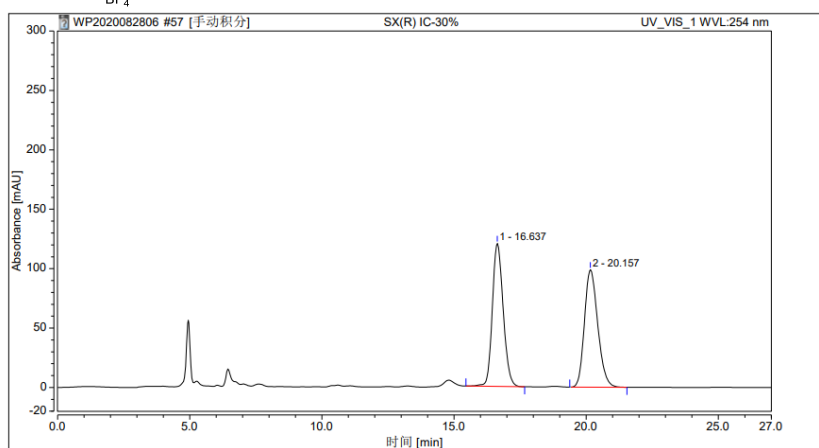

| Peak | Processed Channel | Retention Time (min) | Peak Area (mAU*min) | Peak Height (mAU) | Peak Area (%) |
|------|-------------------|----------------------|---------------------|-------------------|---------------|
| 1    | DAD 245.0 nm      | 16.637               | 57.370              | 120.394           | 49.87         |
| 2    | DAD 245.0 nm      | 20.157               | 57.662              | 98.899            | 50.13         |



NHC:

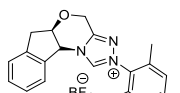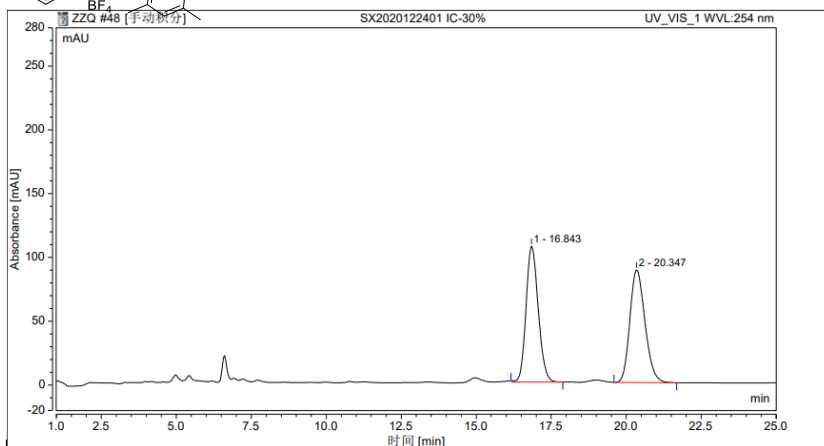

| Peak | Processed Channel | Retention Time (min) | Peak Area (mAU*min) | Peak Height (mAU) | Peak Area (%) |
|------|-------------------|----------------------|---------------------|-------------------|---------------|
| 1    | DAD 245.0 nm      | 16.843               | 50.228              | 106.569           | 49.29         |
| 2    | DAD 245.0 nm      | 20.347               | 51.667              | 88.276            | 50.71         |

NHC:

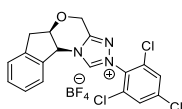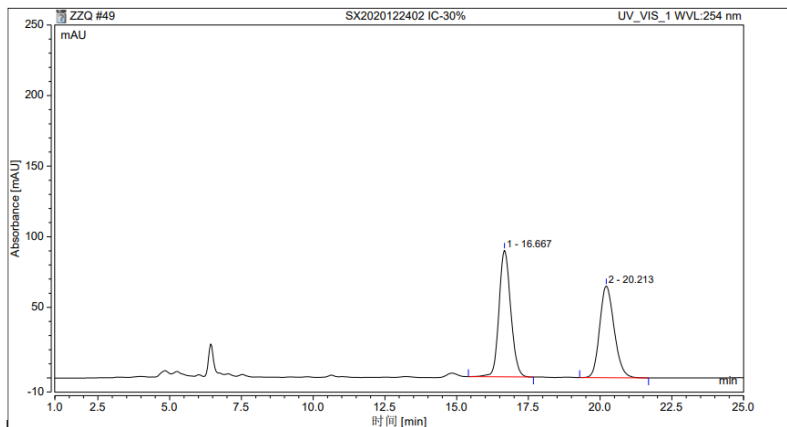

| Peak | Processed Channel | Retention Time (min) | Peak Area (mAU*min) | Peak Height (mAU) | Peak Area (%) |
|------|-------------------|----------------------|---------------------|-------------------|---------------|
| 1    | DAD 245.0 nm      | 16.667               | 42.477              | 89.717            | 52.75         |
| 2    | DAD 245.0 nm      | 20.213               | 38.042              | 64.989            | 47.25         |

NHC:

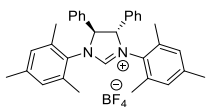

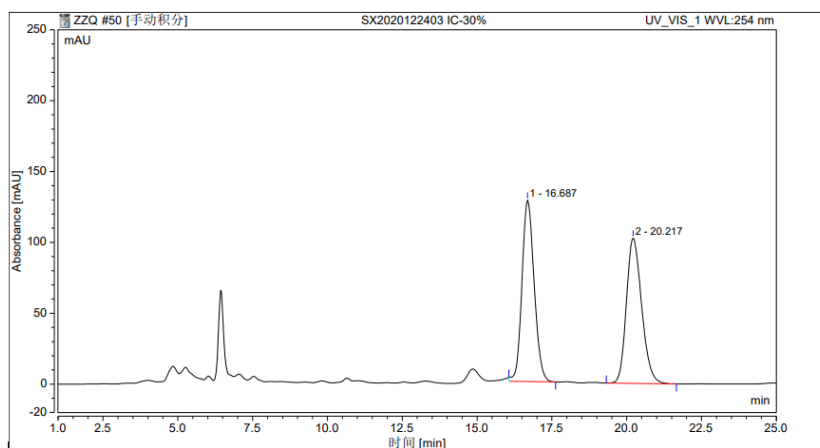

| Peak | Processed Channel | Retention Time (min) | Peak Area (mAU*min) | Peak Height (mAU) | Peak Area (%) |
|------|-------------------|----------------------|---------------------|-------------------|---------------|
| 1    | DAD 245.0 nm      | 16.687               | 60.618              | 128.036           | 50.01         |
| 2    | DAD 245.0 nm      | 20.217               | 60.598              | 102.561           | 49.99         |

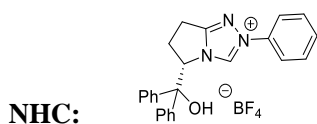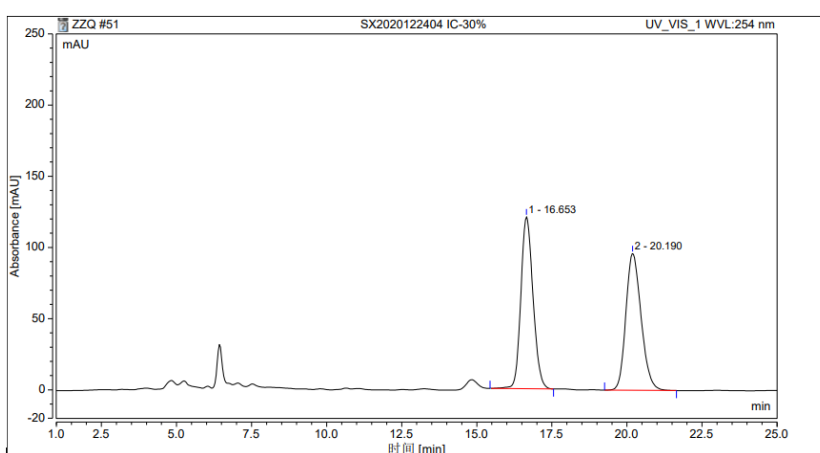

| Peak | Processed Channel | Retention Time (min) | Peak Area (mAU*min) | Peak Height (mAU) | Peak Area (%) |
|------|-------------------|----------------------|---------------------|-------------------|---------------|
| 1    | DAD 245.0 nm      | 16.653               | 56.729              | 120.883           | 50.07         |
| 2    | DAD 245.0 nm      | 20.190               | 56.575              | 96.108            | 49.93         |

#### 4 References

- (1) H. U. Vora, S. P. Lathrop, N. T. Reynolds, M. S. Kerr, J. R. d. Alaniz and T. Rovis, *Org. Synth.* **2010**, 87, 350 – 361.
- (2) L. Rout and A. M. Harned, *Chem. Eur. J.* **2009**, 15, 12926 – 12928.
- (3) L. L. Liu, D. H. Guo and J. Wang, *Org. Lett.* **2020**, 22, 7025 – 7029.
